# Supplementary material
Source: publisher figshare collection journal article supplement (https://tandf.figshare.com/articles/dataset/_/7171748)
Supplement: Supplementary file 1 [file gsar_a_1518928_sm6409.xlsx]

## Sheet: Supplemental Table 1
Supplemental Table 1: Experimental and predicted physiochemical data
Name	SMILES	pKa					LogP			LogHLC
		ADMET	Pipeline Pilot	Experimentala	FE (fold difference)(Experimental/ADMET)	FE (fold difference)(Experimental/Pipeline pilot)	ADMET	Experimental	FE (fold difference)(Experimental/ADMET)	ADMET	Experimentala	FE (fold difference)(Experimental/ADMET)
BDFE	C(C(F)F)Br						1.39			-2.03
Sulfuryl Fluoride	FS(F)(=O)=O						0.09			-2.14
Triclopyr ( acid)	Clc1cc(Cl)c(Cl)nc1OCC(=O)O	2.49	3.97	3.97	1.59438	1	2.33			-9.01
Picloram	Nc1c(Cl)c(nc(Cl)c1Cl)C(=O)O	2.5	1.5	2.3	0.92	1.66667	1.99	0.3	6.63333	-10.67
2,4-D	Clc1cc(Cl)ccc1OCC(=O)O	2.87	2.9	3.02	1.05226	1.04138	2.65	2.81	1.06038	-8.42
Haloxyfop	O=C(O)C(C)Oc1ccc(cc1)Oc2ncc(cc2Cl)C(F)(F)F	3.22	2.9	2.9	0.900621	1	4.01			-8.51
Tebuthiuron	CC(C)(C)c1nnc(s1)N(C)C(=O)NC	2.29					1.84	1.79	1.02793	-9.38	-9.92082	1.05766
729 acid	Clc1c(N)cc(nc1C(O)=O)c2ccc(O)c(OC)c2N	6.87	3.61	5.3	0.77147	1.46814	0.36	0.86	2.38889	-13.64
729 methyl	COC(=O)c1nc(cc(N)c1Cl)c2ccc(O)c(OC)c2N	9.18	10.41				1.6	3.1	1.9375	-12.58
729 benzyl model only	Oc3ccc(c1cc(N)c(Cl)c(n1)C(=O)OCc2ccccc2)c(N)c3OC	9.45	10.41				3.01	4	1.3289	-13.3
848 benzyl	Clc3ccc(c2nc(C(=O)OCc1ccccc1)c(Cl)c(N)c2F)c(F)c3OC	1.26					4.85	3.93	1.2341	-10.43
848 methyl model only	COC(=O)c1nc(c(F)c(N)c1Cl)c2ccc(Cl)c(OC)c2F	0.36					3.43	3.19	1.07524	-9.27
123	FC(F)(F)CCS(=O)CCC(=O)N(CC)c1cn(nc1Cl)c2cnccc2	3.3		2.43	0.736364		1.08	2.28	2.11111	-9.08
777	CC(C)C(=O)OCOc1c(OC)ccnc1C(=O)N3COC(=O)[C@H](Cc2ccccc2)[C@@H](OC(=O)C(C)C)[C@H](C)OC3=O	2.66		2.66	1		3.43	4.32	1.25948	-10.65
Halothane	BrC(Cl)C(F)(F)F						2.41	2.3	1.04783	-1.38	-1.6925	1.22645
Isoflurane	FC(F)(F)C(Cl)OC(F)F						1.77	2.06	1.16384	-1.99	-1.54212	1.29043
Metaphane	COc1cc(ccc1CC(N)C(=O)O)N(CCCl)CCCl	2.15	2.64				-0.08			-12.39
2,6-diisopropylphenol	CC(C)c1cccc(C(C)C)c1O	11.14	10.8	11.1	0.996409	1.02778	3.96	3.79	1.04485	-4.63
Chloroform	C(Cl)(Cl)Cl						1.81	1.97	1.0884	-2.39	-2.43533	1.01897
Trichloroethylene (TCE)	C(=C(Cl)Cl)Cl						2.6	2.42	1.07438	-2.57	-2.00656	1.2808
Tetrachloroethylene (Perc)	C(=C(Cl)Cl)(Cl)Cl						3.21	3.4	1.05919	-2.47	-1.75203	1.4098
Dichloropropene (Telone)	C(C=CCl)Cl						2.21	2.04	1.08333	-2.81	-2.44977	1.14705
Ethylene dibromide (EDB)	C(CBr)Br						2.05	1.96	1.04592	-2.36	-3.18709	1.35046
ethanol	CCO		15.9	15.9		1	-0.31	-0.31	1	-5.33	-5.30103	1.00546
Butoxyethanol (Dowanol EB)	CCCCOCCO		14.8				0.67	0.83	1.23881	-5.82	-5.79588	0.995856
Propylene glycol methyl ether (Dowanol PGME)	CC(=O)OC(C)COC						0.8	0.56	1.42857	-4.55
Benzene	C1=CC=CC=C1						1.97	2.13	1.08122	-2.37
Toluene	CC1=CC=CC=C1						2.51	2.73	1.08765	-2.65	-2.17783	1.21681
Ethylbenzene	CCC1=CC=CC=C1						3.08	3.15	1.02273	-2.5	-2.10347	1.18851
Naphthalene	C1=CC=C2C=CC=CC2=C1						3.41	3.3	1.03333	-3.2	-3.35655	1.04892
Styrene	C=CC1=CC=CC=C1						2.76	2.95	1.06884	-2.66	-2.56067	1.03879
Triclosan	C1=CC(=C(C=C1Cl)O)OC2=C(C=C(C=C2)Cl)Cl	7.82	9				5.58	4.76	1.17227	-7.2
Acetaminophen	CC(=O)NC1=CC=C(C=C1)O	9.78	9.5	9.38	0.9591	1.01279	0.5	0.46	1.08696	-9.28
5-fluorouracil	C1=C(C(=O)NC(=O)N1)F	7.45	8.02	8.02	1.07651	1	-0.81	-0.89	1.09877	-5.44
Moxestrol	CC12CC(C3C(C1CCC2(C#C)O)CCC4=C3C=CC(=C4)O)OC	10.28	13.18				3.3	3.01	1.09635	-9.56
DL-071-IT	CC(C)(C)NCC(COC1=CC=CC2=C1C(=O)OC2)O.Cl	9.37	16.12				1.85			-9.84
Acrolein	C=CC=O						0.16	-0.01	-16	-4.7	-3.91364	1.20093
Epichlorohydrin	C1C(O1)CCl						0.56	0.45	1.24444	-3.99
Quinone dye (vs. catechol)	Oc1ccc(O)cc1	10.86	9.91	10.85	0.999079	1.09485	0.73	0.59	1.23729	-7.57
Glutaraldehyde	C(CC=O)CC=O						0.04			-5.4
Methylbenzylisothiazolinone (MBIT)	CN1C(=O)C2=CC=CC=C2S1						1.57			-4.95
CS-1246	CC12COCN2COC1	5.8					-0.52			-6.64
P-1487 (Composition A)	[O-][N+](=O)C(CC)CN1CCOCC1	9.98	8.32				0.69			-7.79
P-1487 (composition B)	[O-][N+](=O)C(CN1CCOCC1)(CN2CCOCC2)CC	5.7					0.63			-10.68
CS-1134	CC1(C)COCN1	8.76					-0.15			-5.69
2,4-Diisocyanatotoluene	CC1=C(C=C(C=C1)N=C=O)N=C=O	-1.91					1.98			-7.73
MDI	C1=CC(=CC=C1CC2=CC=C(C=C2)N=C=O)N=C=O	-0.33					3.11			-9.17
PEG-200 (tetraethylene glycol)	C(COCCOCCOCCO)O		14.8				-1.26			-8.45
carboxylic acid salts (or acids)….eg: TCA	C(=O)(C(Cl)(Cl)Cl)O	0.05	0.63	0.512	10.24	1.23047	1.51	1.33	1.13534	-7.91	-7.86967	1.00513
sulfoniums trifluoromethanesulfonic Acid	C(F)(F)(F)S(=O)(=O)O	-1.16	-8.56				-0.47			-4.86
free radicals (TEMPO)	CC1(CCCC(N1O)(C)C)C	5.63					1.58	1.85	1.17089	-5
Tamoxifen	CCC(=C(C1=CC=CC=C1)C2=CC=C(C=C2)OCCN(C)C)C3=CC=CC=C3	8.48					6.64			-6.8
Tannic acid	C1=C(C=C(C(=C1O)O)O)C(=O)OC2=CC(=CC(=C2O)O)C(=O)OC[C@@H]3[C@H]([C@@H]([C@H]([C@@H](O3)OC(=O)C4=CC(=C(C(=C4)OC(=O)C5=CC(=C(C(=C5)O)O)O)O)O)OC(=O)C6=CC(=C(C(=C6)OC(=O)C7=CC(=C(C(=C7)O)O)O)O)O)OC(=O)C8=CC(=C(C(=C8)OC(=O)C9=CC(=C(C(=C9)O)O)O)O)O)OC(=O)C1=CC(=C(C(=C1)OC(=O)C1=CC(=C(C(=C1)O)O)O)O)O		8.31				-4			-19.43
Carboxymethylcellulose (CMC)	CC(=O)O.C(C(C(C(C(C=O)O)O)O)O)O.[Na]		12.92
1-(2-Aminoethyl)piperazine	NCCN1CCNCC1	9.89					-1.15			-9.91
1,1'-iminodipropan-2-ol	CC(O)CNCC(C)O	9.62	16.71	9.1	0.945946	1.83626	-0.6	-0.82	1.36667	-7.84
1,1'-oxydibenzene	c1ccccc1Oc2ccccc2						4.02	4.21	1.04726	-4.24
1,2-Benzisothiazolin-3-one	O=C2NSc1ccccc12	8.29					1.58			-6.38
1,2-Propylene glycol	CC(O)CO		14.54	14.9		1.02476	-1	-0.92	1.08696	-6.94
1,3-Benzenedimethanamine	NCc1cccc(CN)c1	9.44					0.22			-8.98
1-Amino-2-propanol	CC(O)CN	9.76	16.71	9.937	1.01814	1.68159	-1.03	-0.96	1.07292	-7.5
1-Phenoxy-2-propanol	CC(O)COc1ccccc1		16.51				1.68			-7.09
1-Propanol	CCCO		16.1	16.1		1	0.17	0.25	1.47059	-5.18	-5.13018	1.00971
2-(2-butoxyethoxy)ethanol	CCCCOCCOCCO		14.8				0.67	0.56	1.19643	-6.4	-8.14267	1.27229
2-(ethylamino)ethanol	CCNCCO	10.07	15.51				-0.55			-6.71
2,2',2''-nitrilotriethanol	OCCN(CCO)CCO	8.11	15.51	7.762	0.95709	1.9982	-1.41	-1	1.41	-10.08
2,2'-[ethane-1,2-diylbis(oxy)]diethanol	OCCOCCOCCO		14.8				-1.32			-8.11
2,2-dibromo-2-cyanoacetamide	BrC(Br)(C#N)C(N)=O						0.07	0.82	11.7143	-10.09
2,2'-iminodiethanol	OCCNCCO	9.46	15.51	8.96	0.947146	1.73103	-1.61	-1.43	1.12587	-8.49
2,4,6-Tris(dimethylaminomethyl)phenol	Oc1c(cc(cc1CN(C)C)CN(C)C)CN(C)C	10.91	10.05		0		2.52			-10.12
2,4,7,9-Tetramethyl-5-decyne-4,7-diol	OC(C)(C#CC(C)(O)C(C)C)C(C)C		19.41				2.12			-6.08
2-[2-(2-Butoxyethoxy)ethoxy]ethanol	OCCOCCOCCOCCCC		14.8				0.64			-6.92
2-Amino-2-methylpropan-1-ol	CC(C)(N)CO	9.87	15.91	10.194	1.03283	1.56072	-0.58			-7.1
2-Phenoxyethanol	OCCOc1ccccc1		15.1	15.1		1	1.27	1.16	1.09483	-7.36
2-piperazin-1-ylethanol	OCCN1CCNCC1	9.64	15.9				-1.01			-9.69
3-Chloro-1,2-propanediol	CC(CCl)CO		16.1				0.81			-5.35
4,5-Dichloro-2-octyl-3(2H)-isothiazolone	ClC=1SN(CCCCCCCC)C(=S)C=1Cl	-0.66					5.77			-3.9
4-Methylpent-3-en-2-one	C\C(C)=C/C(C)=O						1.14			-4.69
4-Nonylphenol, branched	Oc1ccccc1CCCCCCCCC	10.72	10.3	11.06	1.03172	1.07379	6.07			-5.24
5-Chloro-2-methyl-3(2H)-isothiazolone	ClC1=CC(=O)N(C)S1						0.67			-4.55
Acrylamide	C=CC(N)=O	13.18					-0.75	-0.67	1.1194	-8
Benzophenone	O=C(c1ccccc1)c2ccccc2						3.15	3.18	1.00952	-6.32
Biphenyl	c1cc(ccc1)c2ccccc2						4.08	3.98	1.02513	-3.15	-3.51145	1.11475
Bisphenol A	CC(C)(c1ccc(O)cc1)c2ccc(O)cc2	10.47	10.02				3.64	3.32	1.09639	-7.82
Butyl acrylate	C=CC(=O)OCCCC						2	2.36	1.18	-4.16
cyclohexanone oxime	O\N=C1/CCCCC1	12.35	12.77				1.25	0.84	1.4881	-5.72
Dibenzofuran	c1cccc2oc3ccccc3c12						4	4.12	1.03	-6.05
Dipropylene glycol	OCCCOCCCO		14.79				-0.69			-7.53
Diuron	O=C(Nc1ccccc1)N(C)C	11.71					1.38	2.68	1.94203	-10.08
Docusate sodium	O=S(=O)(O)C(C(=O)OCC(CC)CCCC)C(=O)OCC(CC)CCCC	7.71	6.12				4.29			-7.27
ethane-1,2-diamine	NCCN	10.24		9.922	0.968945		-1.73	-2.04	1.17919	-7.66	-8.76195	1.14386
Ethanolamine	NCCO	9.74	15.51	9.499	0.975257		-1.49	-1.31	1.1374	-7.7
Ethyl acetate	CC(=O)OCC						0.53	0.73	1.37736	-4.06	-3.8729	1.04831
ethylene glycol	OCCO		15.1	15.1		1	-1.47	-1.36	1.08088	-7.11	-7.22185	1.01573
Formalin	C=O			13.27			-0.02	0.35	-17.5	-4.17	-6.47237	1.55213
Furfural	O=CC1CCCO1						0.13	0.41	3.15385	-5.45
Glycerol	OCC(O)CO		14.4	14.4		1	-1.88	-1.76	1.06818	-8.6	-7.76195	1.10797
Isooctadecanoic acid	O=C(O)CCCCCCCCCCCCCCC(C)C	5.09	4.72				7.33			-5.33
Isophorone	O=C1C=C(C)CC(C)(C)C1						2.23	1.7	1.31176	-4.41
methyl 1H-benzimidazol-2-ylcarbamate	O=C(OC)Nc1nc2ccccc2n1	4.03		4.2	1.04218		1.37	1.52	1.10949	-9.72
Methylparaben	Oc1ccc(cc1)C(=O)OC	8.43	8.47				1.75	1.96	1.12	-8.5
N-(2-aminoethyl)ethane-1,2-diamine	NCCNCCN	10.37		10.45	1.00771		-2.01			-9.13
Nitroethane	[O-][N+](=O)CC	8.48	8.57	8.6	1.01415	1.0035	0.19	0.18	1.05556	-4.16	-4.32239	1.03904
Octhilinone	O=C1C=CSN1CCCCCCCC						3.68	2.45	1.50204	-3.47
pentanal	CCCCC=O						1.12	1.31	1.16964	-4.07	-3.83268	1.06192
phenol	Oc1ccccc1	9.84	9.99	9.994	1.01565	1.0004	1.39	1.46	1.05036	-6.28	-6.47756	1.03146
phenylmethanol	OCc1ccccc1		15.4	15.4		1	1.09	1.1	1.00917	-6.67	-6.47237	1.03053
piperazine	C1CNCCN1	9.68		9.731	1.00527		-1.05	-1.5	1.42857	-7.09
Salicylic acid	OC(=O)c1ccccc1O	2.99	2.98	2.97	0.993311	1.00337	2.15	2.26	1.05116	-10.41
Sodium benzoate	[O-]C(=O)c1ccccc1	4.07	3.53				1.79			-8.91
Sodium dodecyl sulfate	[O-]S(=O)(=O)OCCCCCCCCCCCC	0.26	1.58				4.02	1.6	2.5125	-5.22
Sodium dodecylbenzenesulfonate	O=S([O-])(=O)Oc1ccc(cc1)CCCCCCCCCCCC	0.23	1.47				6.25	1.96	3.18878	-6.52
Triisopropanolamine	CC(O)CN(CC(C)O)CC(O)C	8.2	16.71	8.06	0.982927	2.0732	-0.05			-9.06
Tripropylene glycol butyl ether	OCCCOCCCOCCCOCCCC		14.79				1.73			-6.79
aExperimental data were acquired from NIH ChemIDplus (https://chem.nlm.nih.gov/chemidplus/); Empty place in columns means that no experimental data is available
