# Supplementary material
Source: publisher figshare collection journal article supplement (https://tandf.figshare.com/articles/dataset/_/7171748)
Supplement: Supplementary file 2 [file gsar_a_1518928_sm6410.xlsx]

## Sheet: Final Clint and Fup
Supplemental Table 2: Experimental and predicted Clint and Fup
Compound	CAS	SMILES.desalt	Experimental Human.Clint (ul/min/10+E6 Cells) Human hepatocytes	Converted Human.Clint (ul/min/mg HLM protein) from Human hepatocyte#	MET_HLM_Total_Clint (predicted from ADMET) ul/min/mg HLM proten	ADMET Predicted S+fumic (fraction unbound in human liver microsomes at 1mg/mL microsomal protein concentration)	MET_HLM_Total_Clint (predicted from ADMET) ul/min/mg HLM proten ajusted by S + fumic	Fold difference (expt/predicted)	Fold difference (predicted/expt)	Human.Clint.pValue.Reference	Human.Clint.Reference	Experimental Human.Funbound.plasma	S+PrUnbnd from ADMET (%)	S+PrUnbnd from ADMET	fold difference (expt/predicted)	fold difference (predicted/expt)
Sulfentrazone	122836-35-5	CS(=O)(=O)Nc1cc(c(Cl)cc1Cl)N2N=C(C)N(C2=O)C(F)F	5.71453	2.3089	5.41	0.846	4.57686	0.504473	1.98227	Wetmore 2012	Wetmore 2012	0.993304	1.52	0.0152	65.349	0.0153025
Bifenazate	149877-41-8	COc1ccc(cc1NNC(=O)OC(C)C)c2ccccc2	41.1507	16.6265	43.7	0.617	26.9629	0.616645	1.62168	Wetmore 2012	Wetmore 2012	0.836025	2.46	0.0246	33.9848	0.029425
Cyclanilide	113136-77-9	O=C(O)C1(CC1)C(=O)Nc2ccc(Cl)cc2Cl	0.336396	0.135918	5.68	0.892	5.06656	0.0268264	37.2767	Wetmore 2012	Wetmore 2012	0.984015	3.34	0.0334	29.4615	0.0339426
Oxyfluorfen	42874-03-3	Clc2cc(ccc2Oc1ccc([N+]([O-])=O)c(OCC)c1)C(F)(F)F	0	0	21.1	0.088	1.8568	0	#DIV/0!	Wetmore 2012	Wetmore 2012	0.121758	0.86	0.0086	14.1579	0.070632
Vinclozolin	50471-44-8	O=C1N(C(=O)OC1(C)C=C)c2cc(Cl)cc(Cl)c2	18.34	7.4101	23.2	0.483	11.2056	0.661286	1.51221	Wetmore 2012	Wetmore 2012	0.593586	4.25	0.0425	13.9667	0.0715987
Bromoxynil	1689-84-5	Brc1cc(cc(Br)c1O)C#N	7.86628	3.17829	4.79	0.881	4.21999	0.753152	1.32775	Wetmore 2012	Wetmore 2012	0.500085	3.78	0.0378	13.2298	0.0755872
Pentachlorophenol	87-86-5	Clc1c(O)c(Cl)c(Cl)c(Cl)c1Cl	8.764	3.54101	4.09	0.564	2.30676	1.53506	0.651441	Wetmore 2015	Wetmore 2015	0.054413	0.43	0.0043	12.6542	0.0790252
Triflusulfuron-methyl	126535-15-7	O=C(OC)c1cccc(C)c1S(=O)(=O)NC(=O)Nc2nc(nc(OCC(F)(F)F)n2)N(C)C	14.4666	5.84509	11.2	0.881	9.8672	0.592376	1.68812	Wetmore 2012	Wetmore 2012	0.329235	2.7	0.027	12.1939	0.0820082
Fluridone	59756-60-4	CN1C=C(C(=O)C(=C1)c2cc(ccc2)C(F)(F)F)c3ccccc3	5.594	2.2602	207	0.291	60.237	0.0375218	26.6512	Wetmore 2015	Wetmore 2015	0.137807	1.39	0.0139	9.91417	0.100866
Rimsulfuron	122931-48-0	O=S(=O)(NC(=O)Nc1nc(OC)cc(OC)n1)c2ncccc2S(=O)(=O)CC	0	0	6.22	0.952	5.92144	0	#DIV/0!	Wetmore 2012	Wetmore 2012	0.627788	6.98	0.0698	8.9941	0.111184
Clobazam	22316-47-8	Clc1ccc2c(c1)N(C(=O)CC(=O)N2C)c3ccccc3	27	10.9091	23.1	0.836	19.3116	0.564898	1.77023	NA	Ito 2004	0.21	2.49	0.0249	8.43373	0.118571
Dibutyl hexanedioate	105-99-7	O=C(CCCCC(=O)OCCCC)OCCCC	14.034	5.6703	15.5	0.171	2.6505	2.13933	0.467435	Wetmore 2015	Wetmore 2015	0.587203	7.13	0.0713	8.23567	0.121423
Diallyl phthalate	131-17-9	O=C(OCC=C)c1ccccc1C(=O)OCC=C	8.216	3.3196	21.9	0.617	13.5123	0.245672	4.07047	Wetmore 2015	Wetmore 2015	0.962082	11.74	0.1174	8.19491	0.122027
Candoxatril	123122-55-4	O=C(N[C@@H]1CC[C@@H](CC1)C(=O)O)C4(C[C@@H](COCCOC)C(=O)Oc2cc3CCCc3cc2)CCCC4	9.898	3.99919	35.2	0.726	25.5552	0.156492	6.39009	Wetmore 2015	Wetmore 2015	0.265862	3.5	0.035	7.59606	0.131647
Carbaryl	63-25-2	CNC(=O)Oc2cccc1ccccc12	27.2736	11.0196	24.5	0.672	16.464	0.669318	1.49406	Wetmore 2012	Wetmore 2012	0.692246	9.14	0.0914	7.57381	0.132034
Nalidixic_acid	389-08-2	O=C(O)C2=CN(CC)c1nc(C)ccc1C2=O	1.1	0.444444	5.92	0.949	5.61808	0.0791097	12.6407	NA	Tonnelier 2012	0.749	9.94	0.0994	7.53521	0.13271
Carbamazepine	298-46-4	NC(=O)N2c3ccccc3C=Cc1ccccc12	0	0	392	0.698	273.616	0	#DIV/0!	Wetmore 2015	Wetmore 2015	0.514147	7.42	0.0742	6.9292	0.144317
D-cis,trans-allethrin	584-79-2	O=C2CC(OC(=O)C1C(/C=C(\C)C)C1(C)C)C(C)=C2CC=C	2.58803	1.04567	19.9	0.117	2.3283	0.449113	2.22661	Wetmore 2012	Wetmore 2012	0.290181	4.32	0.0432	6.71715	0.148873
Ketamine	6740-88-1	CNC1(CCCCC1=O)c2ccccc2Cl	NA	#VALUE!	97.8	0.63	61.614	#VALUE!	#VALUE!	NA	NA	0.88	13.41	0.1341	6.56227	0.152386
Volinanserin	139290-65-6	COc1cccc(c1OC)[C@H](O)C3CCN(CCc2ccc(F)cc2)CC3	5.464	2.20768	47.5	0.37	17.575	0.125615	7.96086	Wetmore 2015	Wetmore 2015	0.509659	8.22	0.0822	6.20023	0.161284
s-bioallethrin	28434-00-6	O=C2C[C@H](OC(=O)[C@@H]1[C@@H](/C=C(\C)C)C1(C)C)C(C)=C2CC=C	0	0	19.9	0.117	2.3283	0	#DIV/0!	Wetmore 2012	Wetmore 2012	0.237266	4.32	0.0432	5.49226	0.182075
Chloroneb	2675-77-6	COc1cc(Cl)c(cc1Cl)OC	6.30891	2.54905	31.8	0.416	13.2288	0.19269	5.18969	Wetmore 2012	Wetmore 2012	0.577389	10.92	0.1092	5.28744	0.189127
Monobutyl phthalate	131-70-4	O=C(O)c1ccccc1C(=O)OCCCC	0.735865	0.297319	3.75	0.902	3.3825	0.0878992	11.3767	Wetmore 2012	Wetmore 2012	0.207711	3.95	0.0395	5.25849	0.190169
Dicamba	1918-00-9	COc1c(c(Cl)ccc1Cl)C(=O)O	0.648309	0.261943	5.95	0.934	5.5573	0.0471349	21.2157	Wetmore 2012	Wetmore 2012	0.180184	3.45	0.0345	5.22271	0.191471
Flufenacet	142459-58-3	O=C(COc1nnc(s1)C(F)(F)F)N(c2ccc(F)cc2)C(C)C	28.9958	11.7155	29.6	0.603	17.8488	0.656372	1.52353	Wetmore 2012	Wetmore 2012	0.137473	2.72	0.0272	5.05414	0.197858
Imazapic	104098-48-8	O=C1N=C(NC1(C)C(C)C)c2ncc(C)cc2C(=O)O	0	0	4.24	0.959	4.06616	0	#DIV/0!	Wetmore 2012	Wetmore 2012	0.546775	10.86	0.1086	5.03476	0.198619
Tepraloxydim	149979-41-9	CC/C(=N\OC\C=C\Cl)C=1C(=O)CC(CC=1O)C2CCOCC2	3.34924	1.35323	3.54	0.756	2.67624	0.505646	1.97767	Wetmore 2012	Wetmore 2012	0.383433	7.91	0.0791	4.84745	0.206294
Azelaic acid di(2-ethylhexyl) ester	103-24-2	O=C(CCCCCCCC(=O)OCC(CC)CCCC)OCC(CCCC)CC	3.152	1.27354	6180	0.011	67.98	0.018734	53.379	Wetmore 2015	Wetmore 2015	0.031258	0.68	0.0068	4.59676	0.217544
Metalaxyl	57837-19-1	CC(N(C(=O)COC)c1c(C)cccc1C)C(=O)OC	1.5799	0.638344	11.4	0.799	9.1086	0.0700814	14.2691	Wetmore 2012	Wetmore 2012	0.73056	17.12	0.1712	4.26729	0.234341
Di-n-octyl phthalate	117-84-0	O=C(OCCCCCCCC)c1ccccc1C(=O)OCCCCCCCC	0	0	10200	0.011	112.2	0	#DIV/0!	Wetmore 2015	Wetmore 2015	0.023297	0.55	0.0055	4.23582	0.236082
Azinphos-methyl	86-50-0	COP(=S)(OC)SCN1N=Nc2ccccc2C1=O	32.6341	13.1855	12.7	0.689	8.7503	1.50686	0.663632	Wetmore 2012	Wetmore 2012	0.213679	5.28	0.0528	4.04695	0.247099
Aminopyrine	58-15-1	CN(C)C=2C(=O)N(c1ccccc1)N(C)C=2C	4.1	1.65657	24.8	0.862	21.3776	0.0774907	12.9048	NA	Ito 2004	1	25.85	0.2585	3.86847	0.2585
Norflurazon	27314-13-2	FC(F)(F)c1cc(ccc1)N2N=CC(NC)=C(Cl)C2=O	11.0893	4.48052	18.5	0.71	13.135	0.341113	2.93158	Wetmore 2012	Wetmore 2012	0.184057	4.77	0.0477	3.85863	0.259159
Nicardipine	55985-32-5	CC=2NC(C)=C(C(C=2C(=O)OCCN(C)Cc1ccccc1)c3cccc(c3)[N+]([O-])=O)C(=O)OC	402	162.424	27.2	0.077	2.0944	77.5517	0.0128946	NA	Ito/Riley	0.084	2.27	0.0227	3.70044	0.270238
Alprazolam	28981-97-7	Clc1cc2C(=NCc3nnc(C)n3c2cc1)c4ccccc4	33	13.3333	4.87	0.641	3.12167	4.27122	0.234125	NA	Ito 2004	0.32	8.78	0.0878	3.64465	0.274375
Imazapyr	81334-34-1	CC1(N=C(NC1=O)c2ncccc2C(=O)O)C(C)C	0.387413	0.15653	0.933	0.971	0.905943	0.172782	5.78765	Wetmore 2012	Wetmore 2012	0.923123	25.81	0.2581	3.57661	0.279594
Di(2-ethylhexyl)adipate	103-23-1	O=C(CCCCC(=O)OCC(CC)CCCC)OCC(CCCC)CC	13.556	5.47717	1220	0.011	13.42	0.408135	2.45017	Wetmore 2015	Wetmore 2015	0.038614	1.08	0.0108	3.57537	0.279691
Chlorpheniramine	132-22-9	Clc1ccc(cc1)C(CCN(C)C)c2ccccn2	2.8	1.13131	44.7	0.55	24.585	0.0460164	21.7314	NA	McGinnity 2004	0.7	20.05	0.2005	3.49127	0.286429
Dimethomorph	110488-70-5	O=C(C=C(c1ccc(Cl)cc1)c2ccc(OC)c(OC)c2)N3CCOCC3	20.3025	8.20303	65.5	0.318	20.829	0.393828	2.53918	Wetmore 2012	Wetmore 2012	0.0942762	2.76	0.0276	3.4158	0.292757
Triticonazole	131983-72-7	Clc1ccc(cc1)C=C3CCC(C)(C)C3(O)Cn2cncn2	6.1175	2.47172	15.8	0.383	6.0514	0.408454	2.44826	Wetmore 2012	Wetmore 2012	0.137257	4.11	0.0411	3.33957	0.299439
Tribufos	78-48-8	CCCCSP(=O)(SCCCC)SCCCC	125.086	50.54	11100	0.011	122.1	0.413923	2.41591	Wetmore 2012	Wetmore 2012	0.0665067	2.04	0.0204	3.26013	0.306736
Aflatoxin	1162-65-8	O=C2Oc1c4C5C=COC5Oc4cc(OC)c1C=3CCC(=O)C2=3	3.49	1.4101	9.55	0.826	7.8883	0.178759	5.59414	NA	Tonnelier 2012	0.458	14.21	0.1421	3.22308	0.310262
Carbofuran	1563-66-2	CNC(=O)Oc1cccc2CC(C)(C)Oc12	0	0	13	0.687	8.931	0	#DIV/0!	Wetmore 2015	Wetmore 2015	0.421325	13.61	0.1361	3.0957	0.323029
3,3'-dimethoxybenzidine)	119-90-4	Nc1ccc(cc1OC)c2ccc(N)c(OC)c2	18.046	7.29131	118	0.705	83.19	0.0876465	11.4095	Wetmore 2015	Wetmore 2015	0.334289	11.06	0.1106	3.0225	0.330851
Diazoxon	962-58-3	Cc1cc(OP(=O)(OCC)OCC)nc(n1)C(C)C	34.6226	13.9889	10.2	0.771	7.8642	1.77881	0.562173	Wetmore 2012	Wetmore 2012	0.326939	10.98	0.1098	2.97759	0.335842
Butam	35256-85-0	CC(C)(C)C(=O)N(Cc1ccccc1)C(C)C	9.846	3.97818	55.4	0.406	22.4924	0.176868	5.65394	Wetmore 2015	Wetmore 2015	0.226735	7.73	0.0773	2.93318	0.340927
Heptabarbitone	509-86-4	CCC1(C(=O)NC(=O)NC1=O)C1=CCCCCC1	29	11.7172	14.8	0.762	11.2776	1.03898	0.962485	NA	Ito 2004	0.62	21.38	0.2138	2.89991	0.344839
Metolachlor	51218-45-2	ClCC(=O)N(C(C)COC)c1c(C)cccc1CC	35.3747	14.2928	80.1	0.488	39.0888	0.36565	2.73486	Wetmore 2012	Wetmore 2012	0.17734	6.14	0.0614	2.88828	0.346227
Quinclorac	84087-01-4	O=C(O)c1c(Cl)ccc2cc(Cl)cnc12	0	0	11.5	0.908	10.442	0	#DIV/0!	Wetmore 2012	Wetmore 2012	0.0279939	0.98	0.0098	2.85652	0.350076
Ketoconazole	65277-42-1	CC(=O)N1CCN(CC1)c2ccc(cc2)OC[C@H]4CO[C@@](Cn3cncc3)(O4)c5ccc(Cl)cc5Cl	55	22.2222	89.1	0.309	27.5319	0.807145	1.23894	NA	Ito 2004	0.062	2.18	0.0218	2.84404	0.351613
Scopolamine	51-34-3	OC[C@H](c1ccccc1)C(=O)O[C@H]2C[C@@H]3N(C)[C@H](C2)[C@H]4O[C@@H]34	7	2.82828	6.01	0.822	4.94022	0.572501	1.74672	NA	McGinnity 2004	0.9	31.7	0.317	2.83912	0.352222
Paclobutrazol	76738-62-0	OC(C(Cc1ccc(Cl)cc1)n2cncn2)C(C)(C)C	7.13989	2.8848	17.7	0.5	8.85	0.325967	3.0678	Wetmore 2012	Wetmore 2012	0.153767	5.45	0.0545	2.82142	0.354432
4,4'-methylene bis(2-methylaniline)	838-88-0	Cc2cc(Cc1ccc(N)c(C)c1)ccc2N	3.984	1.6097	205	0.583	119.515	0.0134686	74.2469	Wetmore 2015	Wetmore 2015	0.225677	8.08	0.0808	2.79303	0.358034
4'-Hydroxydiclofenac	64118-84-9	OC(=O)CC1=CC=CC=C1NC1=C(Cl)C=C(O)C=C1Cl	0.0066	0.00266667	11.5	0.847	9.7405	0.000273771	3652.69	NA	Ito/Riley	0.017	0.61	0.0061	2.78689	0.358824
Tacrine	321-64-2	Nc1c3ccccc3nc2CCCCc12	1000	404.04	29.6	0.618	18.2928	22.0874	0.0452747	NA	Ito 2004	1	35.92	0.3592	2.78396	0.3592
Fluometuron	2164-17-2	O=C(Nc1cc(ccc1)C(F)(F)F)N(C)C	10.0579	4.06381	38.9	0.656	25.5184	0.15925	6.27943	Wetmore 2012	Wetmore 2012	0.258916	9.32	0.0932	2.77806	0.359963
Diphenhydramine hydrochloride	147-24-0	CN(C)CCOC(c1ccccc1)c2ccccc2	0	0	17.1	0.492	8.4132	0	#DIV/0!	Wetmore 2015	Wetmore 2015	0.413104	14.97	0.1497	2.75955	0.362378
Chloramphenicol	56-75-7	O=[N+]([O-])c1ccc(cc1)[C@@H](O)[C@@H](CO)NC(=O)C(Cl)Cl	0.723	0.292121	2.97	0.888	2.63736	0.110763	9.02831	NA	Tonnelier 2012	0.481	17.88	0.1788	2.69016	0.371726
Benzyl hydrogen phthalate	2528-16-7	O=C(O)c2ccccc2C(=O)OCc1ccccc1	0	0	5.95	0.889	5.28955	0	#DIV/0!	Wetmore 2015	Wetmore 2015	0.035199	1.31	0.0131	2.68695	0.37217
Lorcainide	59729-31-6	CC(C)N1CCC(CC1)N(c2ccc(Cl)cc2)C(=O)Cc3ccccc3	NA	#VALUE!	88.7	0.526	46.6562	#VALUE!	#VALUE!	NA	NA	0.15	5.68	0.0568	2.64085	0.378667
Loxtidine	76956-02-0	OCc3nc(NCCCOc2cc(CN1CCCCC1)ccc2)n(C)n3	11	4.44444	17	0.659	11.203	0.396719	2.52068	NA	Ito 2004	0.96	36.46	0.3646	2.63302	0.379792
Alprenolol	13655-52-2	CC(C)NCC(O)COc1ccccc1CC=C	36	14.5455	7.91	0.683	5.40253	2.69234	0.371424	NA	Ito 2004	1	38.05	0.3805	2.62812	0.3805
Fluconazole	86386-73-4	OC(Cn1cncn1)(Cn2cncn2)c3ccc(F)cc3F	1.8322	0.740283	7.08	0.903	6.39324	0.115791	8.63621	Wetmore 2015	Wetmore 2015	0.710946	27.41	0.2741	2.59375	0.385543
Monuron	150-68-5	Clc1ccc(NC(=O)N(C)C)cc1	3.086	1.24687	77.5	0.752	58.28	0.0213945	46.7411	Wetmore 2015	Wetmore 2015	0.45508	18.34	0.1834	2.48135	0.403006
Thiophanate-methyl	23564-05-8	S=C(Nc1ccccc1NC(=S)NC(=O)OC)NC(=O)OC	2.46869	0.997452	13.2	0.85	11.22	0.0888995	11.2487	Wetmore 2012	Wetmore 2012	0.427007	17.36	0.1736	2.45972	0.406551
Heptachlor	76-44-8	ClC2=C(Cl)C3(Cl)C1C=CC(Cl)C1C2(Cl)C3(Cl)Cl	4.574	1.84808	258	0.011	2.838	0.651191	1.53565	Wetmore 2015	Wetmore 2015	0.043328	1.77	0.0177	2.44791	0.408512
Dextromethorphan	125-71-3	COc3ccc4C[C@@H]1N(C)CC[C@]2(CCCC[C@H]12)c4c3	7.6	3.07071	43.9	0.404	17.7356	0.173138	5.77574	NA	McGinnity 2004	0.45	18.44	0.1844	2.44035	0.409778
Bosentan	147536-97-8	CC(C)(C)c1ccc(cc1)S(=O)(=O)Nc3nc(nc(OCCO)c3Oc2ccccc2OC)c4ncccn4	2.4	0.969697	32.9	0.503	16.5487	0.0585966	17.0658	NA	Ito/Riley	0.02	0.82	0.0082	2.43902	0.41
Betaxolol	63659-18-7	CC(C)NCC(O)COc1ccc(cc1)CCOCC2CC2	2.5	1.0101	6.88	0.59	4.0592	0.248842	4.01861	NA	McGinnity 2004	0.54	23.14	0.2314	2.33362	0.428519
Codeine	76-57-3	COc1ccc2C[C@H]4N(C)CC[C@@]35[C@@H](Oc1c23)[C@@H](O)C=C[C@@H]45	23	9.29293	8.54	0.782	6.67828	1.39152	0.718641	NA	McGinnity 2004	1	43.17	0.4317	2.31642	0.4317
Clonazepam	1622-61-3	[O-][N+](=O)c1ccc2NC(=O)CN=C(c2c1)c3ccccc3Cl	15	6.06061	2.96	0.778	2.30288	2.63175	0.379975	NA	Ito 2004	0.21	9.1	0.091	2.30769	0.433333
Triamcinolone	124-94-7	OCC(=O)[C@@]3(O)[C@H](O)C[C@H]2[C@@H]4CCC1=CC(=O)C=C[C@]1(C)[C@@]4(F)[C@@H](O)C[C@@]23C	2.492	1.00687	2.25	0.854	1.9215	0.524001	1.90839	Wetmore 2015	Wetmore 2015	0.734755	31.94	0.3194	2.30042	0.434703
Haloperidol	52-86-8	Fc1ccc(cc1)C(=O)CCCN2CCC(O)(CC2)c3ccc(Cl)cc3	5.222	2.1099	25.4	0.335	8.509	0.247961	4.03289	Wetmore 2015	Wetmore 2015	0.178447	7.8	0.078	2.28778	0.437105
Imazamox	114311-32-9	CC1(N=C(NC1=O)c2ncc(COC)cc2C(=O)O)C(C)C	0	0	0.684	0.968	0.662112	0	#DIV/0!	Wetmore 2012	Wetmore 2012	0.454824	20.13	0.2013	2.25944	0.442589
1,5-diaminonaphthalene	2243-62-1	Nc2cccc1c2cccc1N	0	0	203	0.855	173.565	0	#DIV/0!	Wetmore 2015	Wetmore 2015	0.633278	28.27	0.2827	2.24011	0.446407
Methidathion	950-37-8	O=C1SC(=NN1CSP(=S)(OC)OC)OC	3.92351	1.58526	8.44	0.755	6.3722	0.248777	4.01966	Wetmore 2012	Wetmore 2012	0.268484	12.06	0.1206	2.22624	0.449189
Diltiazem hydrochloride	33286-22-5	CN(C)CCN1c3ccccc3S[C@H]([C@@H](OC(C)=O)C1=O)c2ccc(OC)cc2	23.476	9.48525	169	0.691	116.779	0.081224	12.3116	NA	Naritomi 2003	0.22	9.94	0.0994	2.21328	0.451818
Hexazinone	51235-04-2	CN(C)C2=NC(=O)N(C1CCCCC1)C(=O)N2C	6.36144	2.57028	41.3	0.856	35.3528	0.0727037	13.7545	Wetmore 2012	Wetmore 2012	0.612982	27.85	0.2785	2.20101	0.454337
1,3-diphenylguanidine	102-06-7	N=C(Nc1ccccc1)Nc2ccccc2	0	0	216	0.684	147.744	0	#DIV/0!	Wetmore 2015	Wetmore 2015	0.784429	36.16	0.3616	2.16933	0.460972
2-chloro-2'-deoxyadenosine	4291-63-8	Nc3nc(Cl)nc2c3ncn2[C@H]1C[C@H](O)[C@@H](CO)O1	0	0	9.14	0.935	8.5459	0	#DIV/0!	Wetmore 2015	Wetmore 2015	0.984837	45.62	0.4562	2.15878	0.463224
N-[(3r)-1-azabicyclo[2.2.2]oct-3-yl]-2,3-dihydro-1,4-benzodioxine-6-carboxamide	527680-56-4	O=C(N[C@H]2CN1CCC2CC1)c3ccc4OCCOc4c3	3.688	1.4901	2.41	0.863	2.07983	0.716453	1.39576	Wetmore 2015	Wetmore 2015	1	46.57	0.4657	2.14731	0.4657
Imazaquin	81335-37-7	CC1(N=C(NC1=O)c2nc3ccccc3cc2C(=O)O)C(C)C	2.45745	0.992909	0.842	0.956	0.804952	1.2335	0.810701	Wetmore 2012	Wetmore 2012	0.151273	7.07	0.0707	2.13965	0.467366
Abamectin	71751-41-2	CO[C@H]1C[C@@H](O[C@@H](C)[C@@H]1O)O[C@@H]2[C@@H](OC)C[C@@H](O[C@H]2C)O[C@@H]3C(C)=CC[C@@H]6C[C@H](OC(=O)[C@@H]4C=C(C)[C@@H](O)[C@H]5OCC(=CC=C[C@@H]3C)[C@@]45O)C[C@@]7(O6)C=C[C@H](C)[C@H](O7)[C@@H](C)CC	5.24036	2.11732	553	0.063	34.839	0.0607744	16.4543	Wetmore 2012	Wetmore 2012	0.0668682	3.17	0.0317	2.10941	0.474067
Pirenzepine	28797-61-7	O=C(CN1CCN(C)CC1)N4c2ccccc2C(=O)Nc3cccnc34	3.60481e-07	1.45649e-07	20.6	0.846	17.4276	8.35736e-09	1.19655e+08	NA	Paixao 2012	0.89	42.68	0.4268	2.08529	0.479551
Bisoprolol	66722-44-9	CC(C)NCC(O)COc1ccc(cc1)COCCOC(C)C	1.6	0.646465	3.49	0.695	2.42555	0.266523	3.75202	NA	McGinnity 2004	0.66	31.87	0.3187	2.07091	0.482879
Metoprolol	51384-51-1	CC(C)NCC(O)COc1ccc(cc1)CCOC	1.47	0.593939	2.98	0.733	2.18434	0.271908	3.67772	NA	Shibata 2002	0.883	42.76	0.4276	2.06501	0.484258
N,n-dimethyloctylamine	7378-99-6	CN(C)CCCCCCCC	35.14	14.198	4.93	0.368	1.81424	7.82586	0.127782	Wetmore 2015	Wetmore 2015	0.562732	27.31	0.2731	2.06053	0.485311
Desipramine	50-47-5	CNCCCN2c3ccccc3CCc1ccccc12	11	4.44444	357	0.298	106.386	0.0417766	23.9368	NA	Lau2002	0.18	8.81	0.0881	2.04313	0.489444
Diltiazem	42399-41-7	CN(C)CCN1c3ccccc3S[C@H]([C@@H](OC(C)=O)C1=O)c2ccc(OC)cc2	4.7	1.89899	169	0.691	116.779	0.0162614	61.4953	NA	Lau2002	0.198	9.94	0.0994	1.99195	0.50202
Methyl 1h-benzimidazol-2-ylcarbamate	10605-21-7	O=C(OC)Nc1nc2ccccc2n1	24	9.69697	15	0.874	13.11	0.739662	1.35197	Wetmore 2015	Wetmore 2015	0.487231	24.54	0.2454	1.98546	0.503663
Dimethoate	60-51-5	COP(=S)(OC)SCC(=O)NC	3.6819	1.48764	4.64	0.879	4.07856	0.364746	2.74164	Wetmore 2012	Wetmore 2012	0.964918	48.65	0.4865	1.98339	0.504188
Fenhexamid	126833-17-8	O=C(Nc1ccc(O)c(Cl)c1Cl)C2(C)CCCCC2	35.2668	14.2492	72.8	0.158	11.5024	1.2388	0.807232	Wetmore 2012	Wetmore 2012	0.0571938	2.89	0.0289	1.97903	0.505299
Acetochlor	34256-82-1	ClCC(=O)N(COCC)c1c(C)cccc1CC	84.7136	34.2277	65.9	0.582	38.3538	0.892421	1.12055	Wetmore 2012	Wetmore 2012	0.159833	8.11	0.0811	1.97081	0.507406
4,4'-oxydianiline	101-80-4	Nc1ccc(cc1)Oc2ccc(N)cc2	0	0	70.9	0.798	56.5782	0	#DIV/0!	Wetmore 2015	Wetmore 2015	0.328437	16.71	0.1671	1.96551	0.508773
Prednisone	53-03-2	OCC(=O)[C@@]3(O)CC[C@H]2[C@@H]4CCC1=CC(=O)C=C[C@]1(C)[C@H]4C(=O)C[C@@]23C	9.09	3.67273	6.73	0.777	5.22921	0.702348	1.42379	Wetmore 2015	Wetmore 2015	0.481827	24.59	0.2459	1.95944	0.510349
5,5-diphenylhydantoin	57-41-0	O=C1NC(=O)C(N1)(c2ccccc2)c3ccccc3	2.33	0.941414	24.5	0.778	19.061	0.0493895	20.2472	Wetmore 2015	Wetmore 2015	0.162413	8.3	0.083	1.95678	0.511043
Dimethenamid	87674-68-8	Cc1csc(C)c1N(C(C)COC)C(=O)CCl	19.921	8.04888	26.6	0.692	18.4072	0.437268	2.28693	Wetmore 2012	Wetmore 2012	0.231773	11.98	0.1198	1.93467	0.516885
Aminopterin	54-62-6	O=C(O)[C@H](CCC(=O)O)NC(=O)c1ccc(cc1)NCc2nc3c(nc2)nc(N)nc3N	0	0	6.3	0.998	6.2874	0	#DIV/0!	NA	Tonnelier 2012	0.75	38.92	0.3892	1.92703	0.518933
Benodanil	15310-01-7	O=C(Nc1ccccc1)c2ccccc2I	21.4	8.64646	184	0.316	58.144	0.148708	6.7246	Wetmore 2015	Wetmore 2015	0.075133	3.92	0.0392	1.91666	0.521741
Fosthiazate	98886-44-3	CC(CC)SP(=O)(OCC)N1CCSC1=O	0	0	15.7	0.748	11.7436	0	#DIV/0!	Wetmore 2012	Wetmore 2012	0.459904	24.16	0.2416	1.90358	0.525327
Doxepin	1668-19-5	CN(C)CC\C=C1\c3ccccc3OCc2ccccc12	13	5.25253	54.1	0.302	16.3382	0.321487	3.11054	NA	McGinnity 2004	0.2	10.54	0.1054	1.89753	0.527
Dextropropoxyphene	469-62-5	CN(C)C[C@@H](C)[C@@](OC(=O)CC)(Cc1ccccc1)c2ccccc2	11	4.44444	430	0.25	107.5	0.0413437	24.1875	NA	Tonnelier 2012	0.12	6.34	0.0634	1.89274	0.528333
Dimethyl phthalate	131-11-3	COC(=O)c1ccccc1C(=O)OC	22.2593	8.99366	8.92	0.831	7.41252	1.21331	0.824194	Wetmore 2012	Wetmore 2012	0.656031	34.99	0.3499	1.87491	0.533359
Antipyrine	60-80-0	O=C2C=C(C)N(C)N2c1ccccc1	0.03	0.0121212	22	0.911	20.042	0.000604791	1653.47	NA	Shibata 2002	0.97	51.88	0.5188	1.8697	0.534845
Formetanate hydrochloride	23422-53-9	O=C(Oc1cccc(c1)/N=C/N(C)C)NC	13.7157	5.5417	9.12	0.855	7.7976	0.710693	1.40708	Wetmore 2012	Wetmore 2012	0.885314	47.44	0.4744	1.86618	0.535855
Flunitrazepam	1622-62-4	[O-][N+](=O)c1ccc2c(c1)C(=NCC(=O)N2C)c3ccccc3F	46	18.5859	1.44	0.814	1.17216	15.8561	0.0630673	NA	Ito 2004	0.25	13.46	0.1346	1.85736	0.5384
Pyrithiobac-sodium	123343-16-8	O=C(O)c2c(Sc1nc(cc(OC)n1)OC)cccc2Cl	3.98489	1.61006	6.17	0.909	5.60853	0.287073	3.48343	Wetmore 2012	Wetmore 2012	0.0269212	1.45	0.0145	1.85663	0.538609
Chloridazon	1698-60-8	O=C2C(Cl)=C(N)C=NN2c1ccccc1	1.87139	0.756118	34	0.874	29.716	0.0254448	39.3007	Wetmore 2012	Wetmore 2012	0.427326	23.07	0.2307	1.8523	0.539869
Dexamethasone	50-02-2	OCC(=O)[C@@]4(O)[C@H](C)C[C@@H]3[C@]4(C)C[C@H](O)[C@@]2(F)[C@H]3CCC1=CC(=O)C=C[C@@]12C	NA	#VALUE!	4.78	0.751	3.58978	#VALUE!	#VALUE!	NA	NA	0.32	17.33	0.1733	1.84651	0.541562
Colchicine	64-86-8	CC(=O)N[C@H]2CCc3cc(OC)c(OC)c(OC)c3C1=CC=C(OC)C(=O)C=C12	0.698	0.28202	17.4	0.885	15.399	0.0183142	54.6025	NA	Tonnelier 2012	0.44	23.88	0.2388	1.84255	0.542727
Diuron	330-54-1	Clc1ccc(NC(=O)N(C)C)cc1Cl	12.1528	4.91023	86.6	0.59	51.094	0.0961018	10.4056	Wetmore 2012	Wetmore 2012	0.16146	8.78	0.0878	1.83895	0.543789
Triazolam	28911-01-5	Clc4ccccc4C1=NCc3nnc(C)n3c2ccc(Cl)cc12	1	0.40404	4.79	0.496	2.37584	0.170062	5.8802	NA	McGinnity 2004	0.1	5.48	0.0548	1.82482	0.548
Physostigmine	57-47-6	CNC(=O)Oc1cc2c(cc1)N(C)[C@H]3N(C)CC[C@@]23C	1.64	0.662626	3.61	0.863	3.11543	0.212692	4.70164	NA	Tonnelier 2012	0.699	38.31	0.3831	1.82459	0.548069
Mesotrione	104206-82-8	O=C2CCCC(=O)C2C(=O)c1ccc(cc1[N+]([O-])=O)S(C)(=O)=O	0.354175	0.143101	3.67	0.929	3.40943	0.0419721	23.8254	Wetmore 2012	Wetmore 2012	0.354754	19.49	0.1949	1.82018	0.549395
Ethoxycoumarin	65216-93-5	CCOC1=CC2=CC=CC=C2OC1=O	26	10.5051	39.7	0.692	27.4724	0.382386	2.61516	NA	Ito 2004	0.22	12.22	0.1222	1.80033	0.555455
Triadimenol	55219-65-3	CC(C)(C)C(O)C(Oc1ccc(Cl)cc1)n2cncn2	0	0	12.1	0.6	7.26	0	#DIV/0!	Wetmore 2012	Wetmore 2012	0.125809	7.02	0.0702	1.79215	0.557988
Acetamiprid	135410-20-7	Clc1ccc(CN(C)C(/C)=N\C#N)cn1	0	0	11.9	0.83	9.877	0	#DIV/0!	Wetmore 2012	Wetmore 2012	0.573219	32.02	0.3202	1.79019	0.5586
Boscalid	188425-85-6	O=C(Nc2ccccc2c1ccc(Cl)cc1)c3cccnc3Cl	17.282	6.98264	386	0.127	49.022	0.142439	7.02056	Wetmore 2012	Wetmore 2012	0.0320144	1.79	0.0179	1.78851	0.559123
P,p'-ddd	72-54-8	Clc1ccc(cc1)C(C(Cl)Cl)c2ccc(Cl)cc2	0	0	798	0.011	8.778	0	#DIV/0!	Wetmore 2015	Wetmore 2015	0.031146	1.75	0.0175	1.77977	0.56187
Isazofos	42509-80-8	CC(C)n1nc(OP(=S)(OCC)OCC)nc1Cl	19.5295	7.89071	7.77	0.43	3.3411	2.36171	0.423422	Wetmore 2012	Wetmore 2012	0.06539	3.75	0.0375	1.74373	0.573482
Naloxone	465-65-6	O=C1CC[C@@]5(O)[C@H]2Cc4ccc(O)c3O[C@@H]1[C@]5(CCN2CC=C)c34	18.31	7.39798	9.9	0.841	8.3259	0.88855	1.12543	NA	Shibata 2002	0.559	32.26	0.3226	1.7328	0.577102
Flutolanil	66332-96-5	CC(C)Oc1cccc(c1)NC(=O)c2ccccc2C(F)(F)F	14.1662	5.72373	476	0.14	66.64	0.0858903	11.6428	Wetmore 2012	Wetmore 2012	0.0188194	1.1	0.011	1.71086	0.584503
Mirex	2385-85-5	ClC53C1(Cl)C4(Cl)C2(Cl)C1(Cl)C(Cl)(Cl)C5(Cl)C2(Cl)C3(Cl)C4(Cl)Cl	0	0	86.5	0.011	0.9515	0	#DIV/0!	Wetmore 2015	Wetmore 2015	0.015083	0.89	0.0089	1.69472	0.590068
Omeprazole	73590-58-6	Cc3c(OC)c(C)cnc3CS(=O)c1nc2cc(ccc2n1)OC	1.7	0.686869	13	0.8	10.4	0.0660451	15.1412	NA	McGinnity 2004	0.16	9.58	0.0958	1.67015	0.59875
Bisphenol-a	80-05-7	CC(C)(c1ccc(O)cc1)c2ccc(O)cc2	19.2933	7.79529	33.9	0.349	11.8311	0.658881	1.51772	Wetmore 2012	Wetmore 2012	0.068217	4.09	0.0409	1.6679	0.599557
Imazethapyr	81335-77-5	CC1(N=C(NC1=O)c2ncc(CC)cc2C(=O)O)C(C)C	2.35063	0.949749	1.01	0.962	0.97162	0.97749	1.02303	Wetmore 2012	Wetmore 2012	0.289509	17.37	0.1737	1.66672	0.599981
Tebuconazole	107534-96-3	OC(Cn1cncn1)(CCc2ccc(Cl)cc2)C(C)(C)C	5.278	2.13253	24.2	0.364	8.8088	0.24209	4.13069	Wetmore 2015	Wetmore 2015	0.066005	3.97	0.0397	1.66259	0.60147
Isoxaben	82558-50-7	CCC(C)(CC)c2cc(NC(=O)c1c(OC)cccc1OC)on2	4.11035	1.66075	142	0.255	36.21	0.0458643	21.8035	Wetmore 2012	Wetmore 2012	0.0471263	2.88	0.0288	1.63633	0.611124
Orphenadrine	83-98-7	CN(C)CCOC(c1ccccc1)c2ccccc2C	0.723	0.292121	35.7	0.384	13.7088	0.021309	46.9285	NA	Tonnelier 2012	0.175	10.75	0.1075	1.62791	0.614286
Diisopropyl methylphosphonate (dimp)	1445-75-6	CP(=O)(OC(C)C)OC(C)C	0	0	2.14	0.891	1.90674	0	#DIV/0!	Wetmore 2015	Wetmore 2015	0.972747	60.19	0.6019	1.61613	0.618763
Butylbarbitone	77-28-1	CCCCC1(CC)C(=O)NC(=O)NC1=O	1.9	0.767677	14.8	0.828	12.2544	0.062645	15.963	NA	Ito 2004	0.6	37.29	0.3729	1.60901	0.6215
Tetraconazole	112281-77-3	FC(F)C(F)(F)OCC(Cn1cncn1)c2ccc(Cl)cc2Cl	0	0	15.1	0.392	5.9192	0	#DIV/0!	Wetmore 2012	Wetmore 2012	0.024838	1.55	0.0155	1.60245	0.624043
Azido-3'-deoxythymidine	30516-87-1	CC1=CN(C(=O)NC1=O)[C@H]2C[C@H](\N=[N+]=[N-])[C@@H](CO)O2	0	0	7	0.931	6.517	0	#DIV/0!	Wetmore 2015	Wetmore 2015	0.913986	57.04	0.5704	1.60236	0.62408
Methoxyfenozide	161050-58-4	Cc1c(cccc1OC)C(=O)NN(C(=O)c2cc(C)cc(C)c2)C(C)(C)C	16.1979	6.54459	22.4	0.42	9.408	0.695641	1.43752	Wetmore 2012	Wetmore 2012	0.0611938	3.82	0.0382	1.60193	0.624246
Phenolphthalein	77-09-8	Oc1ccc(cc1)C3(OC(=O)c2ccccc23)c4ccc(O)cc4	47.4	19.1515	30.8	0.266	8.1928	2.3376	0.427789	Wetmore 2015	Wetmore 2015	0.03116	1.95	0.0195	1.59795	0.625802
Cyproconazole	94361-06-5	OC(Cn1cncn1)(C(C)C2CC2)c3ccc(Cl)cc3	1.53798	0.621406	20.8	0.584	12.1472	0.0511563	19.5479	Wetmore 2012	Wetmore 2012	0.108556	6.81	0.0681	1.59407	0.627325
Thiamethoxam	153719-23-4	Clc2ncc(CN/1COCN(C)C\1=N\[N+]([O-])=O)s2	0.611501	0.247071	3.59	0.917	3.29203	0.0750513	13.3242	Wetmore 2012	Wetmore 2012	0.828566	52	0.52	1.5934	0.62759
Sulpiride	15676-16-1	CCN2CCCC2CNC(=O)c1cc(ccc1OC)S(N)(=O)=O	0	0	7.31	0.856	6.25736	0	#DIV/0!	NA	Lau2002	1	63.91	0.6391	1.5647	0.6391
3,3,4,4,5,5,6,6,7,7,8,8,8-tridecafluorooctyl methacrylate	2144-53-8	FC(F)(CCOC(=O)C(=C)C)C(F)(F)C(F)(F)C(F)(F)C(F)(F)C(F)(F)F	196.94	79.5717	3.62	0.039	0.14118	563.619	0.00177425	Wetmore 2015	Wetmore 2015	0.026535	1.7	0.017	1.56088	0.640663
Famotidine	76824-35-6	N/C(N)=N/c1nc(CSCCC(\N)=N/S(N)(=O)=O)cs1	3.60481e-07	1.45649e-07	145	0.936	135.72	1.07316e-09	9.31831e+08	NA	Paixao 2012	0.84	54.18	0.5418	1.55039	0.645
Ranitidine	66357-35-5	[O-][N+](=O)\C=C(/NC)NCCSCc1ccc(CN(C)C)o1	1	0.40404	28.7	0.877	25.1699	0.0160525	62.2955	NA	McGinnity 2004	0.95	61.55	0.6155	1.54346	0.647895
Alachlor	15972-60-8	ClCC(=O)N(COC)c1c(cccc1CC)CC	62.9023	25.4151	97.1	0.604	58.6484	0.433347	2.30762	Wetmore 2012	Wetmore 2012	0.133184	8.63	0.0863	1.54327	0.647975
Phenacetin	62-44-2	CCOc1ccc(cc1)NC(C)=O	14.72	5.94747	16.6	0.832	13.8112	0.430627	2.3222	NA	Shibata 2002	0.6	39.36	0.3936	1.52439	0.656
Tannic acid	1401-55-4	O=C(O[C@@H]9O[C@H](COC(=O)c2cc(O)c(O)c(OC(=O)c1cc(O)c(O)c(O)c1)c2)[C@@H](OC(=O)c4cc(O)c(O)c(OC(=O)c3cc(O)c(O)c(O)c3)c4)[C@H](OC(=O)c6cc(O)c(O)c(OC(=O)c5cc(O)c(O)c(O)c5)c6)[C@H]9OC(=O)c8cc(O)c(O)c(OC(=O)c7cc(O)c(O)c(O)c7)c8)c%11cc(O)c(O)c(OC(=O)c%10cc(O)c(O)c(O)c%10)c%11	0	0	16.9	0.977	16.5113	0	#DIV/0!	Wetmore 2015	Wetmore 2015	1	65.74	0.6574	1.52114	0.6574
Diethyltoluamide	134-62-3	Cc1cccc(c1)C(=O)N(CC)CC	3.79675	1.53404	105	0.755	79.275	0.0193509	51.6773	Wetmore 2012	Wetmore 2012	0.355886	23.51	0.2351	1.51376	0.660605
Cyanazine	21725-46-2	Clc1nc(NCC)nc(NC(C)(C)C#N)n1	3.15799	1.27596	17.6	0.758	13.3408	0.0956431	10.4555	Wetmore 2012	Wetmore 2012	0.315522	21.1	0.211	1.49536	0.668733
Pymetrozine	123312-89-0	CC=2CN(/N=C/c1cccnc1)C(=O)NN=2	8.61105	3.47921	7.32	0.923	6.75636	0.514953	1.94192	Wetmore 2012	Wetmore 2012	0.994615	66.77	0.6677	1.48961	0.671315
Fluoxastrobin	361377-29-9	Clc4ccccc4Oc3ncnc(Oc2ccccc2C(=N\OC)/C=1OCCON=1)c3F	16.3464	6.60459	23.7	0.207	4.9059	1.34625	0.742802	Wetmore 2012	Wetmore 2012	0.0362013	2.44	0.0244	1.48366	0.674009
Tebuthiuron	34014-18-1	CC(C)(C)c1nnc(s1)N(C)C(=O)NC	5.28233	2.13428	23.4	0.843	19.7262	0.108195	9.24257	Wetmore 2012	Wetmore 2012	0.417222	28.13	0.2813	1.48319	0.674222
O-tolidine	119-93-7	Cc1cc(ccc1N)c2ccc(N)c(C)c2	0	0	160	0.644	103.04	0	#DIV/0!	Wetmore 2015	Wetmore 2015	0.142699	9.66	0.0966	1.47722	0.676949
Metribuzin	21087-64-9	O=C1C(=NN=C(SC)N1N)C(C)(C)C	1.0668	0.431028	18.5	0.842	15.577	0.0276708	36.1392	Wetmore 2012	Wetmore 2012	0.478672	32.53	0.3253	1.47148	0.679588
Diphenhydramine	58-73-1	CN(C)CCOC(c1ccccc1)c2ccccc2	6	2.42424	17.1	0.492	8.4132	0.288147	3.47044	NA	McGinnity 2004	0.22	14.97	0.1497	1.46961	0.680455
Clomazone	81777-89-1	Clc2ccccc2CN1OCC(C)(C)C1=O	3.03796	1.22746	11.8	0.653	7.7054	0.159299	6.27752	Wetmore 2012	Wetmore 2012	0.173359	11.97	0.1197	1.44828	0.690474
Imipramine	50-49-7	CN(C)CCCN2c3ccccc3CCc1ccccc12	1.78	0.719192	595	0.168	99.96	0.0071948	138.989	NA	Shibata 2002	0.1	6.99	0.0699	1.43062	0.699
Acebutolol	37517-30-9	CC(C)NCC(O)COc1ccc(cc1C(C)=O)NC(=O)CCC	1.8	0.727273	7.28	0.868	6.31904	0.115092	8.68868	NA	McGinnity 2004	0.73	51.14	0.5114	1.42745	0.700548
2,4,6-trichlorophenol	88-06-2	Clc1cc(Cl)cc(Cl)c1O	18.756	7.57818	6.57	0.637	4.18509	1.81076	0.552255	Wetmore 2015	Wetmore 2015	0.015123	1.06	0.0106	1.4267	0.700919
Erythromycin	114-07-8	CN(C)[C@H]3C[C@@H](C)O[C@@H](O[C@@H]2[C@@H](C)[C@H](O[C@H]1C[C@@](C)(OC)[C@@H](O)[C@H](C)O1)[C@@H](C)C(=O)O[C@H](CC)[C@@](C)(O)[C@H](O)[C@@H](C)C(=O)[C@H](C)C[C@@]2(C)O)[C@@H]3O	4.04	1.63232	2.39	0.687	1.64193	0.994149	1.00589	Wetmore 2015	Wetmore 2015	0.565343	39.66	0.3966	1.42547	0.701521
Verapamil	52-53-9	COc1cc(ccc1OC)C(C#N)(CCCN(C)CCc2ccc(OC)c(OC)c2)C(C)C	4.65	1.87879	725	0.223	161.675	0.0116208	86.0528	NA	Shibata 2002	0.1	7.13	0.0713	1.40252	0.713
Linuron	330-55-2	Clc1ccc(NC(=O)N(C)OC)cc1Cl	33.0541	13.3552	15.9	0.621	9.8739	1.35257	0.739331	Wetmore 2012	Wetmore 2012	0.105123	7.51	0.0751	1.39977	0.714401
Zolpidem	82626-48-0	CN(C)C(=O)Cc1c(nc2ccc(C)cn12)c3ccc(C)cc3	1.29252e-05	5.22232e-06	115	0.738	84.87	6.15331e-08	1.62514e+07	NA	Paixao 2012	0.08	5.75	0.0575	1.3913	0.71875
Warfarin	81-81-2	CC(=O)CC(C1=C(O)c2ccccc2OC1=O)c3ccccc3	0	0	14.6	0.804	11.7384	0	#DIV/0!	Wetmore 2015	Wetmore 2015	0.011776	0.85	0.0085	1.38541	0.721807
Azoxystrobin	131860-33-8	O=C(OC)\C(=C\OC)c3ccccc3Oc2cc(Oc1ccccc1C#N)ncn2	32.394	13.0885	37.4	0.523	19.5602	0.669138	1.49446	Wetmore 2012	Wetmore 2012	0.0476342	3.48	0.0348	1.3688	0.730567
Ondansetron	99614-02-5	O=C1C(CCc3c1c2ccccc2n3C)Cn4ccnc4C	1.4	0.565657	28.3	0.741	20.9703	0.0269742	37.0725	NA	McGinnity 2004	0.25	18.33	0.1833	1.36388	0.7332
Simazine	122-34-9	Clc1nc(NCC)nc(NCC)n1	6.32606	2.55598	27.7	0.709	19.6393	0.130146	7.68366	Wetmore 2012	Wetmore 2012	0.284499	20.91	0.2091	1.36059	0.734976
Lorazepam	846-49-1	Clc3ccccc3C2=NC(O)C(=O)Nc1ccc(Cl)cc12	0.27	0.109091	2.65	0.794	2.1041	0.0518468	19.2876	NA	Lau2002	0.09	6.62	0.0662	1.35952	0.735556
Pindolol	13523-86-9	CC(C)NCC(O)COc2cccc1nccc12	2.8	1.13131	17.5	0.741	12.9675	0.0872422	11.4623	NA	McGinnity 2004	0.58	42.7	0.427	1.35831	0.736207
Atropine	000051-55-8	CN1[C@H]2CC[C@@H]1C[C@@H](C2)OC(=O)C(CO)C1=CC=CC=C1	0.496	0.200404	3.18	0.767	2.43906	0.0821645	12.1707	NA	Tonnelier 2012	0.6336	47.19	0.4719	1.34266	0.744792
Maprotinline	010262-69-8	CNCCCC12CCC(C3=C1C=CC=C3)C1=C2C=CC=C1	0.723	0.292121	223	0.247	55.081	0.00530348	188.555	NA	Tonnelier 2012	0.0916	6.91	0.0691	1.32562	0.754367
Amobarbital	57-43-2	O=C1NC(=O)NC(=O)C1(CCC(C)C)CC	NA	#VALUE!	15.3	0.781	11.9493	#VALUE!	#VALUE!	NA	NA	0.39	29.49	0.2949	1.32248	0.756154
Diclofenac	15307-86-5	Clc2cccc(Cl)c2Nc1ccccc1CC(=O)O	0.77	0.311111	22.8	0.737	16.8036	0.0185146	54.0116	NA	Shibata 2002	0.005	0.38	0.0038	1.31579	0.76
N-phenyl-1,4-benzenediamine	101-54-2	Nc2ccc(Nc1ccccc1)cc2	15.586	6.29737	344	0.661	227.384	0.0276949	36.1078	Wetmore 2015	Wetmore 2015	0.143351	10.96	0.1096	1.30795	0.764557
Androstenedione	63-05-8	O=C2CC[C@H]3[C@@H]4CCC1=CC(=O)CC[C@]1(C)[C@H]4CC[C@]23C	25.92	10.4727	57.9	0.461	26.6919	0.392356	2.54871	Wetmore 2015	Wetmore 2015	0.174363	13.34	0.1334	1.30707	0.765071
Propamocarb hydrochloride	25606-41-1	O=C(NCCCN(C)C)OCCC	5.81496	2.34948	1.21	0.887	1.07327	2.18909	0.456812	Wetmore 2012	Wetmore 2012	0.843484	64.55	0.6455	1.30671	0.765278
Strychnine	57-24-9	O=C2C[C@@H]7OCC=C6CN4CC[C@@]53c1ccccc1N2[C@H]3[C@H]7[C@H]6C[C@H]45	2	0.808081	6.65	0.861	5.72565	0.141133	7.08549	NA	Tonnelier 2012	0.457	35.02	0.3502	1.30497	0.766302
Methadone	76-99-3	CCC(=O)C(CC(C)N(C)C)(c1ccccc1)c2ccccc2	1.34	0.541414	288	0.403	116.064	0.00466479	214.372	NA	Tonnelier 2012	0.156	11.98	0.1198	1.30217	0.767949
Prochloraz	67747-09-5	O=C(N(CCOc1c(Cl)cc(Cl)cc1Cl)CCC)n2ccnc2	16.3995	6.62606	608	0.495	300.96	0.0220164	45.4206	Wetmore 2012	Wetmore 2012	0.0223695	1.73	0.0173	1.29304	0.773373
Hexobarbital	56-29-1	CC1(C(=O)N=C(O)N(C)C1=O)C2=CCCCC2	19.8	8	0.698	0.948	0.661704	12.09	0.082713	NA	Ito/Riley	0.53	41.31	0.4131	1.28298	0.779434
Oxytetracycline hydrochloride	2058-46-0	NC(=O)C=3C(=O)[C@@]4(O)C(O)=C2C(=O)c1c(O)cccc1[C@@](C)(O)[C@H]2[C@H](O)[C@H]4[C@@H](C=3O)N(C)C	0	0	5.31	0.966	5.12946	0	#DIV/0!	Wetmore 2015	Wetmore 2015	0.628327	49	0.49	1.2823	0.779849
Triadimefon	43121-43-3	CC(C)(C)C(=O)C(Oc1ccc(Cl)cc1)n2cncn2	14.5884	5.8943	9.2	0.651	5.9892	0.984155	1.0161	Wetmore 2012	Wetmore 2012	0.114217	8.96	0.0896	1.27475	0.78447
2-[2-(2-ethoxyethoxy)ethoxy]ethanol	112-50-5	OCCOCCOCCOCC	0	0	1.2	0.936	1.1232	0	#DIV/0!	Wetmore 2015	Wetmore 2015	1	78.72	0.7872	1.27033	0.7872
Acephate	30560-19-1	O=C(C)NP(=O)(OC)SC	0	0	4.03	0.942	3.79626	0	#DIV/0!	Wetmore 2012	Wetmore 2012	0.868373	68.87	0.6887	1.26089	0.793092
Pyrimethamine	58-14-0	CCc1nc(N)nc(N)c1c2ccc(Cl)cc2	2.768	1.11838	50.2	0.647	32.4794	0.0344336	29.0414	Wetmore 2015	Wetmore 2015	0.117685	9.42	0.0942	1.24931	0.800442
Rifampicin	13292-46-1	CN1CCN(CC1)/N=C/c3c2NC(=O)C(C)=CC=C[C@H](C)[C@H](O)[C@@H](C)[C@@H](O)[C@@H](C)[C@H](OC(C)=O)[C@H](C)[C@@H](OC)C=CO[C@@]5(C)Oc4c(C)c(O)c(c2O)c(c3O)c4C5=O	0	0	22.9	0.778	17.8162	0	#DIV/0!	Wetmore 2015	Wetmore 2015	0.130374	10.45	0.1045	1.2476	0.80154
Procainamide	51-06-9	O=C(NCCN(CC)CC)c1ccc(N)cc1	0.723	0.292121	11.4	0.888	10.1232	0.0288566	34.6541	NA	Tonnelier 2012	0.92	73.95	0.7395	1.24408	0.803804
Theophylline	58-55-9	O=C2c1ncnc1N(C)C(=O)N2C	0.52	0.210101	39.3	0.942	37.0206	0.00567525	176.204	NA	Lau2002	0.9	72.41	0.7241	1.24292	0.804556
Acetaminophen	103-90-2	Oc1ccc(NC(C)=O)cc1	2.442	0.986667	14.6	0.915	13.359	0.0738578	13.5395	Wetmore 2015	Wetmore 2015	1	82.41	0.8241	1.21344	0.8241
Cacodylic acid	75-60-5	C[As](C)(O)=O	0.197575	0.0798281	7.27	0.911	6.62297	0.0120532	82.9654	Wetmore 2012	Wetmore 2012	0.905833	75.02	0.7502	1.20746	0.828188
Diethylphthalate	84-66-2	O=C(OCC)c1ccccc1C(=O)OCC	42.5	17.1717	11.8	0.681	8.0358	2.1369	0.467967	NA	Tonnelier 2012	0.19	15.94	0.1594	1.19197	0.838947
Busulfan	55-98-1	O=S(C)(=O)OCCCCOS(C)(=O)=O	1.39	0.561616	0.232	0.946	0.219472	2.55894	0.390786	NA	Tonnelier 2012	0.838	70.39	0.7039	1.19051	0.839976
Morphine	57-27-2	Oc1ccc2C[C@H]4N(C)CC[C@@]35[C@@H](Oc1c23)[C@@H](O)C=C[C@@H]45	24	9.69697	7.79	0.843	6.56697	1.47663	0.677219	NA	McGinnity 2004	0.65	54.69	0.5469	1.18852	0.841385
Benzidine	92-87-5	Nc1ccc(cc1)c2ccc(N)cc2	6.91	2.79192	147	0.794	116.718	0.0239202	41.8057	Wetmore 2015	Wetmore 2015	0.197716	16.73	0.1673	1.18181	0.846163
Dicrotophos	141-66-2	O=P(OC)(OC)OC(\C)=C\C(=O)N(C)C	1.8868	0.762343	2.67	0.93	2.4831	0.307013	3.2572	Wetmore 2012	Wetmore 2012	0.845731	72.31	0.7231	1.16959	0.855
Fenarimol	60168-88-9	OC(c1ccccc1Cl)(c2cncnc2)c3ccc(Cl)cc3	3.78805	1.53053	65.8	0.446	29.3468	0.0521531	19.1743	Wetmore 2012	Wetmore 2012	0.0367105	3.15	0.0315	1.16541	0.858066
Cycloheximide	66-81-9	O=C2CC(C[C@@H](O)[C@@H]1C[C@@H](C)C[C@H](C)C1=O)CC(=O)N2	1.74	0.70303	5.52	0.906	5.00112	0.140575	7.11366	NA	Tonnelier 2012	0.629	54.08	0.5408	1.16309	0.859777
6-propyl-2-thiouracil	51-52-5	S=C1NC(CCC)=CC(=O)N1	1.3232	0.534626	58.5	0.901	52.7085	0.0101431	98.5894	Wetmore 2015	Wetmore 2015	0.473609	40.76	0.4076	1.16195	0.860626
Atenolol	29122-68-7	CC(C)NCC(O)COc1ccc(cc1)CC(N)=O	3.60481e-07	1.45649e-07	3.22	0.901	2.90122	5.02026e-08	1.99193e+07	NA	Paixao 2012	0.94	81.83	0.8183	1.14872	0.870532
Cimetidine	51481-61-9	N#C\N=C(/NC)NCCSCc1ncnc1C	1.2	0.484848	96.6	0.894	86.3604	0.00561425	178.118	NA	McGinnity 2004	0.78	68.02	0.6802	1.14672	0.872051
Sethoxydim	74051-80-2	CCC\C(=N\OCC)C1=C(O)CC(CC(C)SCC)CC1=O	11.8721	4.79681	20.7	0.526	10.8882	0.440551	2.26988	Wetmore 2012	Wetmore 2012	0.0547201	4.8	0.048	1.14	0.877192
Tebufenozide	112410-23-8	CCc1ccc(cc1)C(=O)NN(C(=O)c2cc(C)cc(C)c2)C(C)(C)C	22.4005	9.05069	62.5	0.299	18.6875	0.484318	2.06476	Wetmore 2012	Wetmore 2012	0.0337847	2.98	0.0298	1.13371	0.882057
Aminoglutethimide	125-84-8	CCC1(CCC(=O)NC1=O)c2ccc(N)cc2	0.723	0.292121	31.7	0.91	28.847	0.0101266	98.7501	NA	Tonnelier 2012	0.563	49.76	0.4976	1.13143	0.883837
Propanol, 1 (or 2)-(2-methoxymethylethyoxy)-	34590-94-8	COCCCOC(O)CC	0	0	1.2	0.923	1.1076	0	#DIV/0!	Wetmore 2015	Wetmore 2015	0.890092	79.3	0.793	1.12244	0.890919
Metsulfuron-methyl	74223-64-6	Cc2nc(NC(=O)NS(=O)(=O)c1ccccc1C(=O)OC)nc(OC)n2	2.31859	0.936805	12.3	0.947	11.6481	0.0804256	12.4339	Wetmore 2012	Wetmore 2012	0.0859945	7.7	0.077	1.11681	0.895406
Imidacloprid	138261-41-3	[O-][N+](=O)/N=C2\NCCN2Cc1cnc(Cl)cc1	2.80742	1.13431	6.8	0.914	6.2152	0.182506	5.47927	Wetmore 2012	Wetmore 2012	0.655851	58.94	0.5894	1.11274	0.898679
Myclobutanil	88671-89-0	Clc1ccc(cc1)C(CCCC)(Cn2cncn2)C#N	16.3986	6.62569	66.9	0.479	32.0451	0.206761	4.83649	Wetmore 2012	Wetmore 2012	0.0842872	7.7	0.077	1.09464	0.913543
Triethylene glycol diacetate	111-21-7	O=C(C)OCCOCCOCCOC(C)=O	NA	#VALUE!	2.66	0.925	2.4605	#VALUE!	#VALUE!	NA	NA	0.754578	69.52	0.6952	1.08541	0.92131
Cyromazine	66215-27-8	Nc2nc(N)nc(NC1CC1)n2	0	0	22.6	0.917	20.7242	0	#DIV/0!	Wetmore 2012	Wetmore 2012	0.935234	86.52	0.8652	1.08095	0.925116
Midazolam	59467-70-8	Fc4ccccc4C2=NCc1cnc(C)n1c3ccc(Cl)cc23	7	2.82828	7.18	0.372	2.67096	1.0589	0.944375	NA	Lau2002	0.05	4.64	0.0464	1.07759	0.928
Propyzamide	23950-58-5	Clc1cc(cc(Cl)c1)C(=O)NC(C)(C)C#C	5.39975	2.18172	78.2	0.425	33.235	0.0656452	15.2334	Wetmore 2012	Wetmore 2012	0.0675563	6.43	0.0643	1.05064	0.951799
Methylprednisolone	83-43-2	OCC(=O)[C@@]4(O)CC[C@@H]3[C@]4(C)C[C@H](O)[C@H]2[C@H]3C[C@H](C)C1=CC(=O)C=C[C@@]12C	9.7	3.91919	7.18	0.776	5.57168	0.703413	1.42164	NA	Lau2002	0.23	21.91	0.2191	1.04975	0.952609
Thiacloprid	111988-49-9	Clc2ncc(CN1CCS/C1=N\C#N)cc2	2.57353	1.03981	28	0.808	22.624	0.0459604	21.7578	Wetmore 2012	Wetmore 2012	0.285697	27.39	0.2739	1.04307	0.958708
Dimethyl succinate	106-65-0	COC(=O)CCC(=O)OC	364.4	147.232	3.14	0.922	2.89508	50.856	0.0196633	Wetmore 2015	Wetmore 2015	0.999943	95.92	0.9592	1.04248	0.959255
Propoxur	114-26-1	CC(C)Oc1ccccc1OC(=O)NC	6.8992	2.78756	13.9	0.792	11.0088	0.253212	3.94927	Wetmore 2012	Wetmore 2012	0.215949	20.77	0.2077	1.03972	0.961801
(2s,3s)-n-[2-methoxy-5-(trifluoromethoxy)benzyl]-2-phenylpiperidin-3-amine	145742-28-5	FC(F)(F)Oc3cc(CN[C@H]1CCCN[C@H]1c2ccccc2)c(OC)cc3	6.188	2.5002	65.6	0.407	26.6992	0.0936433	10.6788	Wetmore 2015	Wetmore 2015	0.079959	7.73	0.0773	1.0344	0.966745
Thiabendazole	148-79-8	n1c3ccccc3nc1c2cscn2	0	0	139	0.719	99.941	0	#DIV/0!	Wetmore 2012	Wetmore 2012	0.13816	13.46	0.1346	1.02645	0.974233
Valproic acid	99-66-1	CCCC(CCC)C(=O)O	1.76235e-06	7.12061e-07	3.12	0.898	2.80176	2.54148e-07	3.93472e+06	NA	Paixao 2012	0.22	21.5	0.215	1.02326	0.977273
Dazomet	533-74-4	S=C1SCN(C)CN1C	12.4184	5.01755	17.4	0.917	15.9558	0.314466	3.18	Wetmore 2012	Wetmore 2012	0.891427	89.11	0.8911	1.00037	0.999633
Dibutylphthalate	84-74-2	O=C(OCCCC)c1ccccc1C(=O)OCCCC	42.5	17.1717	36.2	0.135	4.887	3.51375	0.284596	NA	Tonnelier 2012	0.028	2.8	0.028	1	1
N,n'-methylenebis(acrylamide)	110-26-9	C=CC(=O)NCNC(=O)C=C	2.954	1.19354	11.1	0.941	10.4451	0.114267	8.7514	Wetmore 2015	Wetmore 2015	1	100	1	1	1
Chlorpromazine	50-53-3	CN(C)CCCN1c3ccccc3Sc2ccc(Cl)cc12	11	4.44444	5170	0.093	480.81	0.00924366	108.182	NA	Lau2002	0.05	5	0.05	1	1
6-desisopropylatrazine	1007-28-9	Nc1nc(NCC)nc(Cl)n1	0	0	23.8	0.856	20.3728	0	#DIV/0!	Wetmore 2012	Wetmore 2012	0.458844	45.97	0.4597	0.998139	1.00186
Granisetron	109889-09-0	CN4[C@@H]1CCC[C@H]4C[C@H](C1)NC(=O)c3nn(C)c2ccccc23	9	3.63636	10.7	0.707	7.5649	0.480689	2.08035	NA	McGinnity 2004	0.35	35.07	0.3507	0.998004	1.002
Pk 11195	85532-75-8	CC(CC)N(C)C(=O)c2cc1ccccc1c(n2)c3ccccc3Cl	42.12	17.0182	758	0.136	103.088	0.165084	6.05752	Wetmore 2015	Wetmore 2015	0.016137	1.62	0.0162	0.996111	1.0039
Isradipine	75695-93-1	O=C(OC)C3=C(C)NC(C)=C(C(=O)OC(C)C)C3c1cccc2nonc12	18	7.27273	13.7	0.409	5.6033	1.29794	0.770454	NA	McGinnity 2004	0.04	4.04	0.0404	0.990099	1.01
Oxasulfuron	144651-06-9	O=C(OC1COC1)c2ccccc2S(=O)(=O)NC(=O)Nc3nc(C)cc(C)n3	3.10693	1.25532	10.9	0.93	10.137	0.123836	8.07521	Wetmore 2012	Wetmore 2012	0.0608386	6.2	0.062	0.981267	1.01909
Oxamyl	23135-22-0	O=C(C(=N\OC(=O)NC)\SC)N(C)C	0	0	6.35	0.92	5.842	0	#DIV/0!	Wetmore 2012	Wetmore 2012	0.792577	81.05	0.8105	0.977886	1.02261
Methyl laurate	111-82-0	O=C(CCCCCCCCCCC)OC	445.2	179.879	39.7	0.011	0.4367	411.905	0.00242775	Wetmore 2015	Wetmore 2015	0.036374	3.74	0.0374	0.972567	1.02821
Hexaconazole	79983-71-4	OC(CCCC)(Cn1cncn1)c2ccc(Cl)cc2Cl	16.22	6.55355	36.3	0.416	15.1008	0.433987	2.30422	Wetmore 2012	Wetmore 2012	0.0409997	4.25	0.0425	0.9647	1.03659
Ethofumesate	26225-79-6	CS(=O)(=O)Oc1cc2c(cc1)OC(OCC)C2(C)C	17.6434	7.12865	4.4	0.767	3.3748	2.11232	0.473413	Wetmore 2012	Wetmore 2012	0.13127	13.92	0.1392	0.943034	1.06041
Lidocaine	137-58-6	O=C(Nc1c(C)cccc1C)CN(CC)CC	2.43	0.981818	31.5	0.822	25.893	0.0379183	26.3725	NA	Shibata 2002	0.296	31.79	0.3179	0.93111	1.07399
2,6-dimethylaniline	87-62-7	Cc1cccc(C)c1N	8.96	3.6202	230	0.827	190.21	0.0190327	52.5413	Wetmore 2015	Wetmore 2015	0.431103	46.84	0.4684	0.920374	1.08652
Icaridin	119515-38-7	CC(OC(=O)N1CCCCC1CCO)CC	12.5635	5.07615	4.94	0.789	3.89766	1.30236	0.767837	Wetmore 2012	Wetmore 2012	0.28418	30.89	0.3089	0.919973	1.08699
Difenzoquat metilsulfate	43222-48-6	Cn2[n+](C)c(cc2c1ccccc1)c3ccccc3	0	0	19.5	0.991	19.3245	0	#DIV/0!	Wetmore 2012	Wetmore 2012	0.851279	93.64	0.9364	0.909097	1.09999
Isoniazide	54-85-3	O=C(NN)c1ccncc1	1.11	0.448485	22	0.943	20.746	0.0216179	46.258	NA	Tonnelier 2012	0.9	100	1	0.9	1.11111
Aldicarb	116-06-3	CC(C)(\C=N\OC(=O)NC)SC	0.745642	0.301269	14.1	0.872	12.2952	0.024503	40.8113	Wetmore 2012	Wetmore 2012	0.480917	54.05	0.5405	0.889764	1.12389
Atrazine	1912-24-9	Clc1nc(NCC)nc(NC(C)C)n1	6.20937	2.50884	28.4	0.59	16.756	0.149728	6.67879	Wetmore 2012	Wetmore 2012	0.123704	13.96	0.1396	0.886134	1.1285
Ethoxybenzamide	938-73-8	CCOc1ccccc1C(N)=O	1.3	0.525253	22.1	0.886	19.5806	0.0268251	37.2784	NA	Ito 2004	0.5	57.33	0.5733	0.872144	1.1466
Phosmet	732-11-6	COP(=S)(OC)SCN2C(=O)c1ccccc1C2=O	23.82	9.62424	17.5	0.541	9.4675	1.01656	0.983714	Wetmore 2015	Wetmore 2015	0.047697	5.49	0.0549	0.868798	1.15102
Perfluorooctane sulfonic acid	1763-23-1	FC(F)(C(F)(F)S(=O)(=O)O)C(F)(F)C(F)(F)C(F)(F)C(F)(F)C(F)(F)C(F)(F)F	0	0	0.263	0.701	0.184363	0	#DIV/0!	Wetmore 2012	Wetmore 2012	0.00475805	0.55	0.0055	0.8651	1.15594
P-cresidine	120-71-8	Nc1cc(C)ccc1OC	19.532	7.89172	50.3	0.831	41.7993	0.1888	5.2966	Wetmore 2015	Wetmore 2015	0.404307	47.23	0.4723	0.856039	1.16817
Dimethyl glutarate	1119-40-0	O=C(CCCC(=O)OC)OC	46.3	18.7071	4.45	0.898	3.9961	4.68133	0.213614	Wetmore 2015	Wetmore 2015	0.698905	82.32	0.8232	0.84901	1.17784
4-tert-butylphenol	98-54-4	CC(C)(C)c1ccc(O)cc1	26.8	10.8283	26.3	0.457	12.0191	0.900923	1.10997	Wetmore 2015	Wetmore 2015	0.10521	12.43	0.1243	0.84642	1.18145
Clothianidin	210880-92-5	Clc1ncc(CN/C(=N/[N+]([O-])=O)NC)s1	10.7271	4.33418	23.3	0.913	21.2729	0.203742	4.90818	Wetmore 2012	Wetmore 2012	0.505854	60.03	0.6003	0.842669	1.18671
Caffeine-uf (red>100%)	58-08-2	O=C2c1n(C)cnc1N(C)C(=O)N2C	0	0	29.7	0.943	28.0071	0	#DIV/0!	Wetmore 2015	Wetmore 2015	0.594118	71.54	0.7154	0.83047	1.20414
Prednisolone	50-24-8	OCC(=O)[C@@]4(O)CC[C@@H]3[C@]4(C)C[C@H](O)[C@H]2[C@H]3CCC1=CC(=O)C=C[C@@]12C	9.7	3.91919	6.15	0.813	4.99995	0.783846	1.27576	NA	Lau2002	0.23	27.81	0.2781	0.827041	1.20913
Flumetsulam	98967-40-9	Fc3cccc(F)c3NS(=O)(=O)c1nc2nc(C)ccn2n1	7.5207	3.03867	15.2	0.937	14.2424	0.213353	4.68706	Wetmore 2012	Wetmore 2012	0.0172668	2.09	0.0209	0.826162	1.21042
Resorcinol	108-46-3	Oc1cccc(O)c1	14.48	5.85051	23.2	0.904	20.9728	0.278957	3.58478	Wetmore 2015	Wetmore 2015	0.744792	90.6	0.906	0.822066	1.21645
Oxytetracycline dihydrate	6153-64-6	NC(=O)C=3C(=O)[C@@]4(O)C(O)=C2C(=O)c1c(O)cccc1[C@@](C)(O)[C@H]2[C@H](O)[C@H]4[C@@H](C=3O)N(C)C	0	0	5.31	0.966	5.12946	0	#DIV/0!	Wetmore 2012	Wetmore 2012	0.398169	49	0.49	0.812589	1.23063
Flusilazole	85509-19-9	C[Si](Cn1cncn1)(c2ccc(F)cc2)c3ccc(F)cc3	6.95934	2.81185	65.6	0.239	15.6784	0.179346	5.57582	Wetmore 2012	Wetmore 2012	0.0289307	3.57	0.0357	0.810385	1.23398
Methylphenidate	113-45-1	O=C(OC)C(C1CCCCN1)c2ccccc2	2.51	1.01414	5.88	0.726	4.26888	0.237566	4.20935	NA	Tonnelier 2012	0.377	46.57	0.4657	0.809534	1.23528
Phenol	108-95-2	Oc1ccccc1	5.496	2.22061	77.8	0.859	66.8302	0.0332276	30.0955	Wetmore 2015	Wetmore 2015	0.620064	76.82	0.7682	0.807165	1.2389
Carboxin	5234-68-4	O=C(Nc1ccccc1)C=2SCCOC=2C	24.4088	9.86215	37.7	0.765	28.8405	0.341955	2.92436	Wetmore 2012	Wetmore 2012	0.175037	21.73	0.2173	0.805509	1.24145
Amitriptyline	50-48-6	CN(C)CC\C=C1\c3ccccc3CCc2ccccc12	0.723	0.292121	125	0.15	18.75	0.0155798	64.1857	NA	Tonnelier 2012	0.05	6.31	0.0631	0.792393	1.262
Methoxsalen	298-81-7	COc1c3occc3cc2C=CC(=O)Oc12	NA	#VALUE!	42.1	0.747	31.4487	#VALUE!	#VALUE!	NA	NA	0.09	11.45	0.1145	0.786026	1.27222
Penoxsulam	219714-96-2	FC(F)(F)c1cccc(OCC(F)F)c1S(=O)(=O)Nc2nc3c(cnc(OC)n3n2)OC	0	0	9.52	0.877	8.34904	0	#DIV/0!	Wetmore 2012	Wetmore 2012	0.0100891	1.29	0.0129	0.7821	1.27861
Terbutaline	23031-25-6	Oc1cc(cc(O)c1)C(O)CNC(C)(C)C	0	0	2.84	0.901	2.55884	0	#DIV/0!	NA	Lau2002	0.75	96.64	0.9664	0.776076	1.28853
Fenamiphos	22224-92-6	Cc1cc(ccc1SC)OP(=O)(NC(C)C)OCC	62.1113	25.0955	48.3	0.577	27.8691	0.900476	1.11052	Wetmore 2012	Wetmore 2012	0.0413825	5.42	0.0542	0.763515	1.30973
Benzophenone	119-61-9	O=C(c1ccccc1)c2ccccc2	9.134	3.69051	240	0.493	118.32	0.0311909	32.0607	Wetmore 2015	Wetmore 2015	0.06543	8.59	0.0859	0.7617	1.31285
Pyrene	129-00-0	c1ccc2ccc3cccc4ccc1c2c34	6.18	2.49697	456	0.063	28.728	0.0869176	11.5051	Wetmore 2015	Wetmore 2015	0.024152	3.23	0.0323	0.74774	1.33736
Eugenol	97-53-0	Oc1ccc(cc1OC)CC=C	103.62	41.8667	43	0.737	31.691	1.32109	0.756951	Wetmore 2015	Wetmore 2015	0.192161	26.15	0.2615	0.734841	1.36084
Timolol	26839-75-8	O[C@H](COc1nsnc1N2CCOCC2)CNC(C)(C)C	0.69	0.278788	3.14	0.786	2.46804	0.112959	8.85275	NA	Shibata 2002	0.4	54.57	0.5457	0.733003	1.36425
Bromocriptine	25614-03-3	Brc3nc2cccc1C4=C[C@H](CN(C)[C@@H]4Cc3c12)C(=O)N[C@@]7(O[C@]6(O)N([C@@H](CC(C)C)C(=O)N5CCC[C@H]56)C7=O)C(C)C	37	14.9495	24.4	0.685	16.714	0.89443	1.11803	NA	McGinnity 2004	0.07	9.58	0.0958	0.730689	1.36857
Bendiocarb	22781-23-3	CNC(=O)Oc1cccc2OC(C)(C)Oc12	21.6613	8.75204	10.8	0.845	9.126	0.959022	1.04273	Wetmore 2012	Wetmore 2012	0.197104	27.01	0.2701	0.729745	1.37034
Methyleugenol	93-15-2	COc1cc(ccc1OC)CC=C	26.56	10.7313	49.3	0.549	27.0657	0.396491	2.52212	Wetmore 2015	Wetmore 2015	0.141587	19.42	0.1942	0.729078	1.37159
Aldrin	309-00-2	ClC3=C(Cl)[C@]4(Cl)[C@@H]2[C@@H]1CC(C=C1)[C@@H]2C3(Cl)[C@@]4(Cl)Cl	0	0	469	0.011	5.159	0	#DIV/0!	Wetmore 2015	Wetmore 2015	0.013398	1.87	0.0187	0.716471	1.39573
Pirimicarb	23103-98-2	Cc1nc(nc(OC(=O)N(C)C)c1C)N(C)C	22.5341	9.10467	6.24	0.824	5.14176	1.77073	0.564739	Wetmore 2012	Wetmore 2012	0.163337	22.84	0.2284	0.715134	1.39834
Coumarin	91-64-5	O=C1C=Cc2ccccc2O1	0	0	57.2	0.798	45.6456	0	#DIV/0!	Wetmore 2015	Wetmore 2015	0.19224	26.89	0.2689	0.714913	1.39877
Tolbutamide	64-77-7	Cc1ccc(cc1)S(=O)(=O)NC(=O)NCCCC	1.6	0.646465	12.4	0.859	10.6516	0.0606918	16.4767	NA	Lau2002	0.04	5.64	0.0564	0.70922	1.41
Fluroxypyr	69377-81-7	O=C(O)COc1nc(F)c(Cl)c(N)c1Cl	1.79142	0.723805	1.92	0.952	1.82784	0.395989	2.52532	Wetmore 2012	Wetmore 2012	0.091941	13.01	0.1301	0.706695	1.41504
4-(1,1,3,3-tetramethylbutyl)phenol	140-66-9	Oc1ccc(cc1)C(C)(C)CC(C)(C)C	26.98	10.901	88.1	0.051	4.4931	2.42617	0.412173	Wetmore 2015	Wetmore 2015	0.019025	2.7	0.027	0.70463	1.41919
2-methylphenol	95-48-7	Cc1ccccc1O	27.48	11.103	57	0.815	46.455	0.239006	4.18399	Wetmore 2015	Wetmore 2015	0.380042	53.96	0.5396	0.704303	1.41984
Gibberellic_acid	77-06-5	O=C(O)[C@H]3[C@@H]5[C@]1(C)C(=O)O[C@]5(C=C[C@@H]1O)[C@@H]4CC[C@]2(O)C[C@]34CC2=C	0	0	3.78	0.968	3.65904	0	#DIV/0!	NA	Tonnelier 2012	0.24	34.39	0.3439	0.697877	1.43292
2-methoxy-5-nitroaniline	99-59-2	Nc1cc(ccc1OC)[N+]([O-])=O	12.028	4.8598	14.4	0.829	11.9376	0.4071	2.4564	Wetmore 2015	Wetmore 2015	0.335937	48.25	0.4825	0.696242	1.43628
2-naphthylamine	91-59-8	Nc1ccc2ccccc2c1	18.498	7.47394	293	0.678	198.654	0.0376229	26.5796	Wetmore 2015	Wetmore 2015	0.109897	15.83	0.1583	0.694232	1.44044
Fenpropathrin	39515-41-8	CC3(C)C(C(=O)OC(C#N)c2cccc(Oc1ccccc1)c2)C3(C)C	3.17	1.28081	424	0.022	9.328	0.137308	7.2829	NA	Tonnelier 2012	0.0083	1.2	0.012	0.691667	1.44578
Fluazinam	79622-59-6	[O-][N+](=O)c2cc(c(Cl)c(c2Nc1ncc(cc1Cl)C(F)(F)F)[N+]([O-])=O)C(F)(F)F	24.7601	10.0041	25.4	0.049	1.2446	8.03798	0.124409	Wetmore 2012	Wetmore 2012	0.00435663	0.63	0.0063	0.691529	1.44607
2-tert-butyl-4-methoxy-phenol	121-00-6	CC(C)(C)c1cc(ccc1O)OC	7.06	2.85253	17.4	0.447	7.7778	0.366752	2.72664	Wetmore 2015	Wetmore 2015	0.072169	10.5	0.105	0.687324	1.45492
2,6-di-tert-butylphenol	128-39-2	CC(C)(C)c1cccc(c1O)C(C)(C)C	0	0	81.3	0.063	5.1219	0	#DIV/0!	Wetmore 2015	Wetmore 2015	0.019534	2.85	0.0285	0.685404	1.45899
Chlorpyrifos	2921-88-2	Clc1cc(Cl)c(Cl)nc1OP(=S)(OCC)OCC	2.6	1.05051	12.2	0.071	0.8662	1.21277	0.824556	Wetmore 2015	Tonnelier 2012	0.007932	1.16	0.0116	0.683793	1.46243
Ethoprop	13194-48-4	CCCSP(=O)(SCCC)OCC	20.9483	8.46397	56.6	0.496	28.0736	0.301492	3.31684	Wetmore 2012	Wetmore 2012	0.0934586	13.69	0.1369	0.682678	1.46482
N-nitrosodiphenylamine	86-30-6	O=NN(c1ccccc1)c2ccccc2	8.288	3.34869	50.6	0.505	25.553	0.131049	7.63075	Wetmore 2015	Wetmore 2015	0.043681	6.43	0.0643	0.679331	1.47204
Quinoline	91-22-5	c1cccc2cccnc12	38.6	15.596	197	0.77	151.69	0.102815	9.72624	Wetmore 2015	Wetmore 2015	0.203613	30.57	0.3057	0.666055	1.50138
Quinidine	56-54-2	COc1cc2c(cc1)nccc2[C@H](O)[C@H]4CC3CCN4C[C@@H]3C=C	0.61	0.246465	17.1	0.599	10.2429	0.024062	41.5593	NA	Shibata 2002	0.13	19.56	0.1956	0.664622	1.50462
4-nitrotoluene	99-99-0	Cc1ccc(cc1)[N+](=O)[O-]	19.316	7.80444	30.9	0.72	22.248	0.350793	2.85068	Wetmore 2015	Wetmore 2015	0.265886	40.08	0.4008	0.663388	1.50741
4-methylphenol	106-44-5	Cc1ccc(O)cc1	39.66	16.0242	48.2	0.794	38.2708	0.418707	2.38831	Wetmore 2015	Wetmore 2015	0.32589	49.24	0.4924	0.66184	1.51094
Heptadecafluorooctanesulfonic acid potassium salt	2795-39-3	FC(F)(C(F)(F)S(=O)(=O)O)C(F)(F)C(F)(F)C(F)(F)C(F)(F)C(F)(F)C(F)(F)F	0	0	0.263	0.701	0.184363	0	#DIV/0!	Wetmore 2015	Wetmore 2015	0.00363	0.55	0.0055	0.66	1.51515
Diniconazole	83657-24-3	OC(\C(=C/c1ccc(Cl)cc1Cl)n2cncn2)C(C)(C)C	2.58697	1.04524	21.2	0.271	5.7452	0.181933	5.49654	Wetmore 2012	Wetmore 2012	0.0194679	2.98	0.0298	0.653286	1.53072
2-anisidine	90-04-0	Nc1ccccc1OC	0	0	62.2	0.879	54.6738	0	#DIV/0!	Wetmore 2015	Wetmore 2015	0.453243	70.28	0.7028	0.64491	1.5506
Foramsulfuron	173159-57-4	O=C(Nc1nc(cc(OC)n1)OC)NS(=O)(=O)c2cc(NC=O)ccc2C(=O)N(C)C	0	0	9.53	0.954	9.09162	0	#DIV/0!	Wetmore 2012	Wetmore 2012	0.0648993	10.11	0.1011	0.641932	1.5578
N-nitrosodi-n-butylamine	924-16-3	CCCCN(CCCC)N=O	11.118	4.49212	10	0.635	6.35	0.707421	1.41359	Wetmore 2015	Wetmore 2015	0.260237	40.83	0.4083	0.637367	1.56895
Carvedilol	72956-09-3	COc4ccccc4OCCNCC(O)COc2cccc3nc1ccccc1c23	35	14.1414	91	0.297	27.027	0.523233	1.91119	NA	McGinnity 2004	0.02	3.16	0.0316	0.632911	1.58
Fenvalerate	51630-58-1	Clc1ccc(cc1)C(C(C)C)C(=O)OC(C#N)c3cccc(Oc2ccccc2)c3	0.766	0.309495	4680	0.011	51.48	0.00601195	166.336	NA	Tonnelier 2012	0.005	0.8	0.008	0.625	1.6
2-phenylphenol	90-43-7	Oc2ccccc2c1ccccc1	2.07714	0.839249	79.5	0.417	33.1515	0.0253156	39.5014	Wetmore 2012	Wetmore 2012	0.0410523	6.57	0.0657	0.624844	1.6004
Nifedipine	21829-25-4	CC=1NC(C)=C(C(C=1C(=O)OC)c2ccccc2[N+]([O-])=O)C(=O)OC	7.7	3.11111	11.4	0.51	5.814	0.535107	1.86879	NA	Lau2002	0.044	7.19	0.0719	0.611961	1.63409
Nitrobenzene	98-95-3	[O-][N+](=O)c1ccccc1	8.168	3.3002	39.7	0.809	32.1173	0.102755	9.73192	Wetmore 2015	Wetmore 2015	0.384385	63.3	0.633	0.607243	1.64679
Anthracene	120-12-7	c1ccc2cc3ccccc3cc2c1	13.332	5.38667	385	0.136	52.36	0.102878	9.7203	Wetmore 2015	Wetmore 2015	0.025196	4.17	0.0417	0.604221	1.65502
N-ethyl-3-methylaniline	102-27-2	CCNc1cc(C)ccc1	13.118	5.3002	223	0.618	137.814	0.0384591	26.0017	Wetmore 2015	Wetmore 2015	0.141356	23.54	0.2354	0.600493	1.6653
Genistein	446-72-0	Oc1ccc(cc1)C3=COc2cc(O)cc(O)c2C3=O	18.686	7.5499	8.61	0.718	6.18198	1.22128	0.818816	Wetmore 2015	Wetmore 2015	0.024258	4.07	0.0407	0.59602	1.6778
Triclopyr	55335-06-3	Clc1cc(Cl)c(Cl)nc1OCC(=O)O	0	0	2.26	0.927	2.09502	0	#DIV/0!	Wetmore 2012	Wetmore 2012	0.0223677	3.76	0.0376	0.594886	1.68099
2,6-dimethylphenol	576-26-1	Cc1cccc(C)c1O	20.52	8.29091	52.2	0.743	38.7846	0.213768	4.67797	Wetmore 2015	Wetmore 2015	0.208579	35.23	0.3523	0.592049	1.68905
Thiazopyr	117718-60-2	CC(C)Cc1c(c(nc(C(F)F)c1C(=O)OC)C(F)(F)F)C2=NCCS2	41.4997	16.7676	17.8	0.24	4.272	3.92499	0.254777	Wetmore 2012	Wetmore 2012	0.0113922	1.94	0.0194	0.587226	1.70292
Chlorthal-dimethyl	1861-32-1	Clc1c(C(=O)OC)c(Cl)c(Cl)c(C(=O)OC)c1Cl	38.62	15.604	16.6	0.281	4.6646	3.3452	0.298935	Wetmore 2015	Wetmore 2015	0.016662	2.88	0.0288	0.578542	1.72848
Acenaphthene	83-32-9	c1cc2cccc3CCc(c1)c23	4.846	1.95798	273	0.265	72.345	0.0270645	36.9488	Wetmore 2015	Wetmore 2015	0.045329	7.89	0.0789	0.574512	1.74061
Propranolol	525-66-6	CC(C)NCC(O)COc2cccc1ccccc12	2.28	0.921212	8.14	0.598	4.86772	0.189249	5.28404	NA	Shibata 2002	0.123	21.48	0.2148	0.572626	1.74634
Bisphenol b	77-40-7	Oc1ccc(cc1)C(C)(CC)c2ccc(O)cc2	35.66	14.4081	42.9	0.262	11.2398	1.28188	0.780104	Wetmore 2015	Wetmore 2015	0.01823	3.21	0.0321	0.567913	1.76083
O-ethyl o-(p-nitrophenyl) phenylphosphonothioate	2104-64-5	S=P(OCC)(Oc1ccc(cc1)[N+]([O-])=O)c2ccccc2	8.16	3.29697	18.3	0.088	1.6104	2.0473	0.488449	Wetmore 2015	Wetmore 2015	0.01016	1.8	0.018	0.564444	1.77165
Cyclosporin a	59865-13-3	C[C@H](C\C=C\C)[C@@H](O)[C@H]1C(=O)N[C@@H](CC)C(=O)N(C)CC(=O)N(C)[C@@H](CC(C)C)C(=O)N[C@H](C(=O)N(C)[C@@H](CC(C)C)C(=O)N[C@@H](C)C(=O)N[C@H](C)C(=O)N(C)[C@@H](CC(C)C)C(=O)N(C)[C@@H](CC(C)C)C(=O)N(C)[C@@H](C(C)C)C(=O)N1C)C(C)C	3.5	1.41414	86.2	0.484	41.7208	0.0338954	29.5026	NA	McGinnity 2004	0.062	11.21	0.1121	0.553078	1.80806
Tributyl phosphate	126-73-8	CCCCOP(=O)(OCCCC)OCCCC	0	0	3.76	0.341	1.28216	0	#DIV/0!	Wetmore 2015	Wetmore 2015	0.034805	6.33	0.0633	0.549842	1.8187
Phenoxyethanol	122-99-6	OCCOc1ccccc1	17.8944	7.23005	16.5	0.87	14.355	0.503661	1.98546	Wetmore 2012	Wetmore 2012	0.295713	53.88	0.5388	0.548837	1.82204
Diclosulam	145701-21-9	Clc3cccc(Cl)c3NS(=O)(=O)c1nc2cc(F)nc(OCC)n2n1	3.44224	1.39081	12.4	0.892	11.0608	0.125742	7.9528	Wetmore 2012	Wetmore 2012	0.0064797	1.19	0.0119	0.544512	1.83651
Mepanipyrim	110235-47-7	Cc2cc(nc(Nc1ccccc1)n2)C#CC	12.42	5.01818	79.7	0.47	37.459	0.133965	7.46466	Wetmore 2015	Wetmore 2015	0.034187	6.4	0.064	0.534172	1.87206
Imazalil	35554-44-0	Clc2ccc(C(OCC=C)Cn1ccnc1)c(Cl)c2	1.02459	0.413974	209	0.363	75.867	0.00545657	183.265	Wetmore 2012	Wetmore 2012	0.0295575	5.55	0.0555	0.532568	1.87769
Triasulfuron	82097-50-5	Cc2nc(NC(=O)NS(=O)(=O)c1ccccc1OCCCl)nc(OC)n2	14.5761	5.88932	14.3	0.91	13.013	0.452572	2.20959	Wetmore 2012	Wetmore 2012	0.0230477	4.35	0.0435	0.529831	1.88739
Clozapine	5786-21-0	CN1CCN(CC1)C2=Nc4cc(Cl)ccc4Nc3ccccc23	6	2.42424	33.6	0.361	12.1296	0.199862	5.00346	NA	McGinnity 2004	0.05	9.54	0.0954	0.524109	1.908
3-hydroxyfluorene	6344-67-8	Oc1cc2c3ccccc3Cc2cc1	20.56	8.30707	38.7	0.294	11.3778	0.730112	1.36965	Wetmore 2015	Wetmore 2015	0.024876	4.87	0.0487	0.510801	1.95771
Pirinixic acid	50892-23-4	Cc2cccc(Nc1cc(Cl)nc(SCC(=O)O)n1)c2C	7.51	3.03434	13.8	0.883	12.1854	0.249015	4.01583	Wetmore 2015	Wetmore 2015	0.005454	1.07	0.0107	0.50972	1.96186
Quinotolast	101193-40-2	O=C(NC1=NNN=N1)C1=CC(OC2=CC=CC=C2)=C2C=CC=CN2C1=O	0	0	24.3	0.938	22.7934	0	#DIV/0!	NA	Naritomi 2003	0.0191	3.76	0.0376	0.507979	1.96859
Propylparaben	94-13-3	Oc1ccc(cc1)C(=O)OCCC	38	15.3535	14.9	0.626	9.3274	1.64607	0.607508	Wetmore 2015	Wetmore 2015	0.076393	15.07	0.1507	0.506921	1.97269
Forchlorfenuron	68157-60-8	Clc2cc(NC(=O)Nc1ccccc1)ccn2	26.868	10.8557	111	0.505	56.055	0.193662	5.16363	Wetmore 2012	Wetmore 2012	0.0275498	5.46	0.0546	0.504575	1.98187
8-hydroxyquinoline	148-24-3	Oc1cccc2cccnc12	69.68	28.1535	92.5	0.767	70.9475	0.396822	2.52002	Wetmore 2015	Wetmore 2015	0.118401	23.66	0.2366	0.500427	1.99829
Furosemide	54-31-9	NS(=O)(=O)c2cc(c(NCc1ccco1)cc2Cl)C(=O)O	0	0	14.9	0.923	13.7527	0	#DIV/0!	NA	Lau2002	0.012	2.42	0.0242	0.495868	2.01667
Flutamide	13311-84-7	O=C(Nc1cc(c(cc1)[N+]([O-])=O)C(F)(F)F)C(C)C	30.38	12.2747	7.84	0.567	4.44528	2.7613	0.362148	Wetmore 2015	Wetmore 2015	0.037581	7.67	0.0767	0.489974	2.04092
Fenamidone	161326-34-7	CSC2=N[C@](C)(C(=O)N2Nc1ccccc1)c3ccccc3	17.7365	7.16626	9.3	0.723	6.7239	1.06579	0.938272	Wetmore 2012	Wetmore 2012	0.024362	5.09	0.0509	0.478626	2.08932
Ibuprofen	15687-27-1	CC(C(=O)O)c1ccc(CC(C)C)cc1	4.2	1.69697	10.2	0.816	8.3232	0.203884	4.90474	NA	Lau2002	0.01	2.1	0.021	0.47619	2.1
Benzo[b]fluoranthene	205-99-2	c1cccc5c1cc4c2c5cccc2c3ccccc34	5.564	2.24808	841	0.011	9.251	0.243009	4.11507	Wetmore 2015	Wetmore 2015	0.010588	2.24	0.0224	0.472679	2.1156
Chlordiazepoxide	58-25-3	Clc1ccc2N=C(C[N+](O)=C(c2c1)c3ccccc3)NC	8	3.23232	25.9	0.9	23.31	0.138667	7.21153	NA	Ito 2004	0.15	31.88	0.3188	0.470514	2.12533
Heptachlor epoxide, isomer b	1024-57-3	ClC3=C(Cl)C4(Cl)C2C(C1OC1C2Cl)C3(Cl)C4(Cl)Cl	NA	#VALUE!	6.21	0.099	0.61479	#VALUE!	#VALUE!	Wetmore 2015	Wetmore 2015	0.010676	2.3	0.023	0.464174	2.15436
Isoxaflutole	141112-29-0	O=C(c2cnoc2C1CC1)c3ccc(cc3S(C)(=O)=O)C(F)(F)F	20.4174	8.24947	33.8	0.658	22.2404	0.370923	2.69598	Wetmore 2012	Wetmore 2012	0.0165515	3.62	0.0362	0.457223	2.18712
Terbacil	5902-51-2	O=C1NC(C)=C(Cl)C(=O)N1C(C)(C)C	2.2715	0.917779	30.6	0.868	26.5608	0.0345539	28.9403	Wetmore 2012	Wetmore 2012	0.10289	22.65	0.2265	0.454259	2.20139
Butylparaben	94-26-8	Oc1ccc(cc1)C(=O)OCCCC	39.3	15.8788	16.9	0.475	8.0275	1.97805	0.505549	Wetmore 2015	Wetmore 2015	0.041572	9.23	0.0923	0.450401	2.22024
4-(butan-2-yl)phenol	99-71-8	Oc1ccc(cc1)C(C)CC	19.026	7.68727	48.4	0.493	23.8612	0.322166	3.10399	Wetmore 2015	Wetmore 2015	0.0608	13.61	0.1361	0.44673	2.23849
Cloprop	101-10-0	Clc1cc(OC(C)C(=O)O)ccc1	0	0	6.12	0.933	5.70996	0	#DIV/0!	Wetmore 2012	Wetmore 2012	0.0223853	5.02	0.0502	0.445922	2.24254
Benz[a]anthracene	56-55-3	c1c4ccccc4cc3c1ccc2ccccc23	18.27	7.38182	1070	0.011	11.77	0.627172	1.59446	Wetmore 2015	Wetmore 2015	0.011208	2.55	0.0255	0.439529	2.27516
Ethylparaben	120-47-8	Oc1ccc(cc1)C(=O)OCC	57.24	23.1273	14.3	0.75	10.725	2.15639	0.463738	Wetmore 2015	Wetmore 2015	0.105746	24.2	0.242	0.436967	2.2885
Fluoranthene	206-44-0	c1cccc4c1c2cccc3cccc4c23	8.064	3.25818	416	0.06	24.96	0.130536	7.66071	Wetmore 2015	Wetmore 2015	0.014093	3.3	0.033	0.427061	2.34159
Tris(1,3-dichloro-2-propyl) phosphate (tdcpp)	13674-87-8	ClCC(OP(=O)(OC(CCl)CCl)OC(CCl)CCl)CCl	5.092	2.05737	1.29	0.464	0.59856	3.43721	0.290934	Wetmore 2015	Wetmore 2015	0.010779	2.57	0.0257	0.419416	2.38427
2,6-diethylaniline	579-66-8	CCc1cccc(CC)c1N	16.13	6.51717	313	0.648	202.824	0.0321322	31.1215	Wetmore 2015	Wetmore 2015	0.089617	21.39	0.2139	0.418967	2.38682
Amphetamine	300-62-9	NC(C)Cc1ccccc1	0.511	0.206465	21	0.759	15.939	0.0129534	77.1997	NA	Tonnelier 2012	0.3282	78.69	0.7869	0.41708	2.39762
Methyl parathion	298-00-0	S=P(Oc1ccc(cc1)[N+]([O-])=O)(OC)OC	14.1918	5.73406	5.52	0.536	2.95872	1.93802	0.51599	Wetmore 2012	Wetmore 2012	0.0283193	6.86	0.0686	0.412818	2.42237
2,4,5-trichlorophenol	95-95-4	Oc1cc(Cl)c(Cl)cc1Cl	26.24	10.602	9.44	0.44	4.1536	2.55249	0.391774	Wetmore 2015	Wetmore 2015	0.005322	1.29	0.0129	0.412558	2.4239
Perfluorooctanoic acid	335-67-1	FC(F)(C(F)(F)C(=O)O)C(F)(F)C(F)(F)C(F)(F)C(F)(F)C(F)(F)F	1.64449	0.66444	1.74	0.66	1.1484	0.578579	1.72837	Wetmore 2012	Wetmore 2012	0.00477883	1.16	0.0116	0.411968	2.42737
Lovastatin	75330-75-5	C[C@@H](CC)C(=O)O[C@H]2C[C@@H](C)C=C3C=C[C@H](C)[C@H](CC[C@@H]1C[C@@H](O)CC(=O)O1)[C@@H]23	21.9	8.84848	173	0.13	22.49	0.393441	2.54168	Wetmore 2015	Wetmore 2015	0.01429	3.7	0.037	0.386216	2.58922
1,5,9-cyclododecatriene	4904-61-4	C1C=CCCC=CCCC=CC1	17.278	6.98101	3800	0.068	258.4	0.0270163	37.0147	Wetmore 2015	Wetmore 2015	0.041432	10.73	0.1073	0.386132	2.58979
Dieldrin	60-57-1	ClC1=C(Cl)[C@]5(Cl)C(Cl)(Cl)[C@@]1(Cl)[C@@H]4[C@@H]3C[C@@H]([C@H]2O[C@H]23)[C@@H]45	4.262	1.72202	8.62	0.101	0.87062	1.97792	0.505581	Wetmore 2015	Wetmore 2015	0.009376	2.43	0.0243	0.385844	2.59172
Rotenone	83-79-4	C=C(C)[C@@H]2Oc3ccc1C(=O)[C@H]4c5cc(OC)c(OC)cc5OC[C@H]4Oc1c3C2	20.9239	8.45412	19.4	0.391	7.5854	1.11453	0.897243	Wetmore 2012	Wetmore 2012	0.0171534	4.47	0.0447	0.383746	2.60589
Triflumizole	68694-11-1	FC(F)(F)c2cc(Cl)ccc2\N=C(/COCCC)n1ccnc1	14.2471	5.75641	387	0.173	66.951	0.0859795	11.6307	Wetmore 2012	Wetmore 2012	0.00417173	1.09	0.0109	0.382727	2.61283
Dichlorprop	120-36-5	Clc1cc(Cl)ccc1OC(C)C(=O)O	2.23001	0.901013	6.38	0.897	5.72286	0.157441	6.35158	Wetmore 2012	Wetmore 2012	0.00852943	2.27	0.0227	0.375746	2.66137
Nitrendipine	39562-70-4	CC=1NC(C)=C(C(C=1C(=O)OCC)c2cccc(c2)[N+]([O-])=O)C(=O)OC	7.4	2.9899	10.4	0.385	4.004	0.746728	1.33918	NA	McGinnity 2004	0.02	5.34	0.0534	0.374532	2.67
Propazine	139-40-2	Clc1nc(NC(C)C)nc(NC(C)C)n1	14.6042	5.90069	29.8	0.482	14.3636	0.410809	2.43422	Wetmore 2012	Wetmore 2012	0.0365105	9.96	0.0996	0.366571	2.72798
Oxazepam	604-75-1	Clc1ccc2NC(=O)C(O)N=C(c2c1)c3ccccc3	2	0.808081	2.97	0.835	2.47995	0.325846	3.06894	NA	Lau2002	0.04	11.05	0.1105	0.361991	2.7625
Mcpa	94-74-6	Clc1cc(C)c(OCC(=O)O)cc1	0	0	5.56	0.929	5.16524	0	#DIV/0!	Wetmore 2012	Wetmore 2012	0.0179712	5.06	0.0506	0.355163	2.81561
Ethinylestradiol	57-63-6	Oc3cc4CC[C@@H]2[C@H](CC[C@@]1(C)[C@H]2CC[C@@]1(O)C#C)c4cc3	7	2.82828	27.3	0.319	8.7087	0.324765	3.07915	NA	McGinnity 2004	0.014	4.14	0.0414	0.338164	2.95714
Perfluorooctanesulfonamide	754-91-6	FC(F)(C(F)(F)S(N)(=O)=O)C(F)(F)C(F)(F)C(F)(F)C(F)(F)C(F)(F)C(F)(F)F	11.926	4.81859	1.11	0.222	0.24642	19.5544	0.0511395	Wetmore 2015	Wetmore 2015	0.001515	0.45	0.0045	0.336667	2.9703
Octhilinone	26530-20-1	O=C1C=CSN1CCCCCCCC	12.722	5.1402	109	0.339	36.951	0.139109	7.18863	Wetmore 2015	Wetmore 2015	0.028224	8.4	0.084	0.336	2.97619
Pentadecafluorooctanoic acid ammonium salt	3825-26-1	FC(F)(C(F)(F)C(=O)O)C(F)(F)C(F)(F)C(F)(F)C(F)(F)C(F)(F)F	0	0	1.74	0.66	1.1484	0	#DIV/0!	Wetmore 2015	Wetmore 2015	0.003868	1.16	0.0116	0.333448	2.99897
Dichlobenil	1194-65-6	N#Cc1c(Cl)cccc1Cl	7.03613	2.84288	115	0.608	69.92	0.040659	24.5948	Wetmore 2012	Wetmore 2012	0.0622198	19.03	0.1903	0.326957	3.05851
Bensulide	741-58-2	O=S(=O)(NCCSP(=S)(OC(C)C)OC(C)C)c1ccccc1	250.303	101.133	67.8	0.217	14.7126	6.87388	0.145478	Wetmore 2012	Wetmore 2012	0.00607837	1.86	0.0186	0.326794	3.06003
Prazosin	19216-56-9	O=C(N1CCN(CC1)c3nc2cc(OC)c(OC)cc2c(N)n3)c4ccco4	2.3	0.929293	10.8	0.863	9.3204	0.0997053	10.0296	NA	McGinnity 2004	0.06	18.46	0.1846	0.325027	3.07667
2,6-dinitrotoluene	606-20-2	Cc1c(cccc1[N+](=O)[O-])[N+]([O-])=O	34.64	13.996	14.8	0.823	12.1804	1.14906	0.87028	Wetmore 2015	Wetmore 2015	0.130978	41.13	0.4113	0.318449	3.14022
Bromacil	314-40-9	CCC(C)N1C(=O)C(Br)=C(C)NC1=O	0	0	36.1	0.865	31.2265	0	#DIV/0!	Wetmore 2012	Wetmore 2012	0.0851951	27.69	0.2769	0.307675	3.25019
Progesterone	57-83-0	CC(=O)[C@H]2CC[C@H]3[C@@H]4CCC1=CC(=O)CC[C@]1(C)[C@H]4CC[C@]23C	33.7	13.6162	90.4	0.261	23.5944	0.577093	1.73282	Wetmore 2015	Wetmore 2015	0.02311	7.55	0.0755	0.306093	3.26698
Sildenafil	139755-83-2	CN1CCN(CC1)S(=O)(=O)c4cc(C3=Nc2c(CCC)nn(C)c2C(=O)N3)c(OCC)cc4	5.2	2.10101	32.1	0.706	22.6626	0.0927083	10.7865	NA	Lau2002	0.04	13.15	0.1315	0.304183	3.2875
Bepridil	64706-54-3	CC(C)COCC(CN(Cc1ccccc1)c2ccccc2)N3CCCC3	2	0.808081	4670	0.038	177.46	0.00455359	219.607	NA	McGinnity 2004	0.01	3.4	0.034	0.294118	3.4
Molinate	2212-67-1	O=C(SCC)N1CCCCCC1	11.603	4.68807	66	0.649	42.834	0.109447	9.1368	Wetmore 2012	Wetmore 2012	0.0971446	33.23	0.3323	0.29234	3.42068
Triphenyl phosphate	115-86-6	O=P(Oc1ccccc1)(Oc2ccccc2)Oc3ccccc3	26.44	10.6828	52.7	0.197	10.3819	1.02899	0.971831	Wetmore 2015	Wetmore 2015	0.002852	0.98	0.0098	0.29102	3.43619
Perfluorohexanoic acid	307-24-4	FC(F)(C(F)(F)C(=O)O)C(F)(F)C(F)(F)C(F)(F)F	0	0	1.42	0.83	1.1786	0	#DIV/0!	Wetmore 2015	Wetmore 2015	0.016761	5.77	0.0577	0.290485	3.44252
Ethametsulfuron methyl	97780-06-8	CCOc2nc(nc(NC(=O)NS(=O)(=O)c1ccccc1C(=O)OC)n2)NC	1.07862	0.435806	11.1	0.936	10.3896	0.0419464	23.84	Wetmore 2012	Wetmore 2012	0.0156623	5.54	0.0554	0.282713	3.53716
Diphenylenemethane	86-73-7	c1cccc2Cc3ccccc3c12	12.076	4.87919	154	0.184	28.336	0.172191	5.80752	Wetmore 2015	Wetmore 2015	0.015669	5.7	0.057	0.274895	3.63776
Nilvadipine	75530-68-6	CC=1NC(C#N)=C(C(C=1C(=O)OC(C)C)c2cccc(c2)[N+]([O-])=O)C(=O)OC	2160	872.727	10.2	0.365	3.723	234.415	0.00426594	NA	Ito/Riley	0.013	4.89	0.0489	0.265849	3.76154
Endrin	72-20-8	ClC1=C(Cl)[C@@]5(Cl)C(Cl)(Cl)[C@]1(Cl)[C@H]4[C@@H]3C[C@@H]([C@H]2O[C@H]23)[C@H]45	0	0	8.62	0.101	0.87062	0	#DIV/0!	Wetmore 2015	Wetmore 2015	0.006423	2.43	0.0243	0.264321	3.78328
Thioridazine	50-52-2	CN4CCCCC4CCN1c3ccccc3Sc2ccc(SC)cc12	0.915	0.369697	15000	0.046	690	0.000535793	1866.39	NA	Tonnelier 2012	0.01	3.89	0.0389	0.257069	3.89
Propofol	2078-54-8	CC(C)c1cccc(C(C)C)c1O	107	43.2323	65.9	0.264	17.3976	2.48496	0.402421	NA	McGinnity 2004	0.016	6.25	0.0625	0.256	3.90625
Nadolol	42200-33-9	CC(C)(C)NCC(O)COc2cccc1C[C@@H](O)[C@@H](O)Cc12	3.60481e-07	1.45649e-07	2.07	0.811	1.67877	8.67592e-08	1.15262e+07	NA	Paixao 2012	0.14	54.98	0.5498	0.254638	3.92714
4-aminoazobenzene	60-09-3	Nc2ccc(/N=N/c1ccccc1)cc2	15.698	6.34263	90.5	0.408	36.924	0.171775	5.82156	Wetmore 2015	Wetmore 2015	0.0171	6.84	0.0684	0.25	4
Biphenyl	92-52-4	c1cc(ccc1)c2ccccc2	14.178	5.72848	349	0.233	81.317	0.0704463	14.1952	Wetmore 2015	Wetmore 2015	0.01557	6.25	0.0625	0.24912	4.01413
2,4-dinitrotoluene	121-14-2	Cc1ccc(cc1[N+](=O)[O-])[N+]([O-])=O	0	0	11.4	0.803	9.1542	0	#DIV/0!	Wetmore 2015	Wetmore 2015	0.096021	39.14	0.3914	0.245327	4.07619
Zoxamide	156052-68-5	Clc1cc(cc(Cl)c1C)C(=O)NC(C)(CC)C(=O)CCl	4.18565	1.69117	55.3	0.402	22.2306	0.0760741	13.1451	Wetmore 2012	Wetmore 2012	0.0103104	4.23	0.0423	0.243744	4.10267
N,n,4-trimethylaniline	99-97-8	Cc1ccc(cc1)N(C)C	20.38	8.23434	140	0.564	78.96	0.104285	9.58911	Wetmore 2015	Wetmore 2015	0.054982	24.37	0.2437	0.225613	4.43236
Difenoconazole	119446-68-3	Clc1ccc(cc1)Oc2ccc(c(Cl)c2)C4(Cn3ncnc3)OCC(C)O4	24.2104	9.78197	36.1	0.206	7.4366	1.31538	0.760235	Wetmore 2012	Wetmore 2012	0.00425511	1.92	0.0192	0.22162	4.51222
Buspirone	36505-84-7	O=C4CC1(CCCC1)CC(=O)N4CCCCN2CCN(CC2)c3ncccn3	7.66	3.09495	17.6	0.735	12.936	0.239251	4.17971	NA	Shibata 2002	0.05	22.66	0.2266	0.220653	4.532
Bentazone	25057-89-0	CC(C)N1C(=O)c2ccccc2NS1(=O)=O	0	0	11.6	0.893	10.3588	0	#DIV/0!	Wetmore 2012	Wetmore 2012	0.021472	9.85	0.0985	0.217989	4.58738
Pcb153	35065-27-1	Clc2cc(c1cc(Cl)c(Cl)cc1Cl)c(Cl)cc2Cl	2.72e-06	1.09899e-06	1670	0.011	18.37	5.98253e-08	1.67153e+07	NA	Tonnelier 2012	0.005	2.31	0.0231	0.21645	4.62
Pcb155	33979-03-2	Clc2cc(Cl)cc(Cl)c2c1c(Cl)cc(Cl)cc1Cl	9.24e-06	3.73333e-06	1310	0.011	14.41	2.59079e-07	3.85982e+06	NA	Tonnelier 2012	0.005	2.33	0.0233	0.214592	4.66
Pcb136	38411-22-2	ClC1=CC=C(Cl)C(=C1Cl)C1=C(Cl)C(Cl)=CC=C1Cl	0.00027	0.000109091	1480	0.011	16.28	6.70092e-06	149233	NA	Tonnelier 2012	0.005	2.35	0.0235	0.212766	4.7
2-benzylideneoctanal	101-86-0	O=CC(CCCCCC)=Cc1ccccc1	14.364	5.80364	391	0.12	46.92	0.123692	8.08459	Wetmore 2015	Wetmore 2015	0.009805	4.64	0.0464	0.211315	4.73228
1,2,3-trichlorobenzene	87-61-6	Clc1cccc(Cl)c1Cl	6.984	2.82182	912	0.253	230.736	0.0122296	81.7686	Wetmore 2015	Wetmore 2015	0.015667	7.45	0.0745	0.210295	4.75522
Propafenone	54063-53-5	CCCNCC(O)COc2ccccc2C(=O)CCc1ccccc1	0.00020736	8.3782e-05	29.8	0.572	17.0456	4.91517e-06	203452	NA	Paixao 2012	0.04	19.03	0.1903	0.210194	4.7575
1,3-diisopropylbenzene	99-62-7	CC(C)c1cccc(c1)C(C)C	7.788	3.14667	99.5	0.091	9.0545	0.347525	2.87749	Wetmore 2015	Wetmore 2015	0.012373	5.9	0.059	0.209712	4.76845
Pcb77	32598-13-3	Clc1ccc(cc1Cl)c2ccc(Cl)c(Cl)c2	6.83e-05	2.7596e-05	1780	0.011	19.58	1.4094e-06	709524	NA	Tonnelier 2012	0.005	2.42	0.0242	0.206612	4.84
Pcb80	33284-52-5	ClC1=CC(=CC(Cl)=C1)C1=CC(Cl)=CC(Cl)=C1	3.33e-05	1.34545e-05	1830	0.011	20.13	6.68383e-07	1.49615e+06	NA	Tonnelier 2012	0.005	2.42	0.0242	0.206612	4.84
Chlorprothixene	113-59-7	CN(C)CC\C=C1/c3ccccc3Sc2ccc(Cl)cc12	14	5.65657	2040	0.105	214.2	0.0264079	37.8675	NA	Lau2002	0.01	5.14	0.0514	0.194553	5.14
Methylparaben	99-76-3	Oc1ccc(cc1)C(=O)OC	107.5	43.4343	12.6	0.822	10.3572	4.19364	0.238456	Wetmore 2015	Wetmore 2015	0.070562	36.51	0.3651	0.193268	5.17417
Diazepam	439-14-5	Clc1ccc2c(c1)C(=NCC(=O)N2C)c3ccccc3	0.05	0.020202	6.07	0.736	4.46752	0.00452198	221.142	NA	Shibata 2002	0.013	6.84	0.0684	0.190058	5.26154
N,n-diethyl aniline	91-66-7	CCN(CC)c1ccccc1	9.812	3.96444	344	0.529	181.976	0.0217855	45.902	Wetmore 2015	Wetmore 2015	0.042869	22.61	0.2261	0.189602	5.27421
Pyrimethanil	53112-28-0	Cc2cc(C)nc(Nc1ccccc1)n2	43.8884	17.7327	175	0.564	98.7	0.179662	5.566	Wetmore 2012	Wetmore 2012	0.0167327	8.97	0.0897	0.186541	5.36076
3-nitrotoluene	99-08-1	Cc1cc(ccc1)[N+](=O)[O-]	16.822	6.79677	31.7	0.74	23.458	0.289742	3.45135	Wetmore 2015	Wetmore 2015	0.077279	41.9	0.419	0.184437	5.42191
1,4-dichlorobenzene	106-46-7	Clc1ccc(Cl)cc1	NA	#VALUE!	664	0.397	263.608	#VALUE!	#VALUE!	Wetmore 2015	Wetmore 2015	0.02291	12.45	0.1245	0.184016	5.43431
Reserpine	50-55-5	COc1cc(cc(OC)c1OC)C(=O)O[C@@H]3C[C@@H]4CN5CCc2c6ccc(OC)cc6nc2[C@H]5C[C@@H]4[C@@H]([C@H]3OC)C(=O)OC	12.252	4.9503	98.2	0.29	28.478	0.173829	5.75278	Wetmore 2015	Wetmore 2015	0.005994	3.35	0.0335	0.178925	5.58892
Tenoxicam	59804-37-4	OC=2c1sccc1S(=O)(=O)N(C)C=2C(=O)Nc3ccccn3	2.6	1.05051	23	0.923	21.229	0.0494844	20.2084	NA	Lau2002	0.009	5.17	0.0517	0.174081	5.74444
Ethoxyquin	91-53-2	CCOc1ccc2NC(C)(C)C=C(C)c2c1	15.156	6.12364	70.7	0.224	15.8368	0.386671	2.58618	Wetmore 2015	Wetmore 2015	0.010694	6.29	0.0629	0.170016	5.8818
Potassium nonafluoro-1-butanesulfonate	29420-49-3	FC(F)(C(F)(F)S(=O)(=O)O)C(F)(F)C(F)(F)F	1.1522	0.465535	0.171	0.948	0.162108	2.87176	0.348218	Wetmore 2015	Wetmore 2015	0.019332	11.43	0.1143	0.169134	5.91248
Fk480	150408-73-4	Fc6ccccc6C3=N[C@H](NC(=O)c1cc2ccccc2n1)C(=O)N5CCc4cccc3c45	3.23606	1.3075	10.3	0.466	4.7998	0.272407	3.67098	NA	Naritomi 2003	0.005	2.96	0.0296	0.168919	5.92
9-phenanthrol	484-17-3	Oc2cc3ccccc3c1ccccc12	20.98	8.47677	121	0.22	26.62	0.318436	3.14035	Wetmore 2015	Wetmore 2015	0.005435	3.22	0.0322	0.168789	5.92456
Pyraclostrobin	175013-18-0	O=C(OC)N(OC)c3ccccc3COc1ccn(n1)c2ccc(Cl)cc2	53.9325	21.7909	43.3	0.477	20.6541	1.05504	0.947831	Wetmore 2012	Wetmore 2012	0.0015836	0.97	0.0097	0.163257	6.1253
2,4-dinitrophenol	51-28-5	O=[N+]([O-])c1cc(ccc1O)[N+]([O-])=O	0	0	2.79	0.946	2.63934	0	#DIV/0!	Wetmore 2015	Wetmore 2015	0.027226	16.77	0.1677	0.162349	6.15955
Flumioxazin	103361-09-7	O=C4C=1CCCCC=1C(=O)N4c2cc3c(cc2F)OCC(=O)N3CC#C	8.33618	3.36815	16.2	0.821	13.3002	0.253241	3.94881	Wetmore 2012	Wetmore 2012	0.0280717	18.39	0.1839	0.152646	6.55109
Phorate	298-02-2	CCSCSP(=S)(OCC)OCC	0	0	36.3	0.342	12.4146	0	#DIV/0!	Wetmore 2015	Wetmore 2015	0.012903	8.52	0.0852	0.151444	6.60312
Perfluorononanoic acid	375-95-1	FC(F)(C(F)(F)C(=O)O)C(F)(F)C(F)(F)C(F)(F)C(F)(F)C(F)(F)C(F)(F)F	0	0	2.04	0.578	1.17912	0	#DIV/0!	Wetmore 2015	Wetmore 2015	0.000992	0.67	0.0067	0.14806	6.75403
1,2-dinitrobenzene	528-29-0	O=[N+]([O-])c1ccccc1[N+]([O-])=O	24.2	9.77778	13.6	0.834	11.3424	0.862055	1.16002	Wetmore 2015	Wetmore 2015	0.069494	47.75	0.4775	0.145537	6.8711
Halosulfuron-methyl	100784-20-1	Clc1nn(C)c(c1C(=O)OC)S(=O)(=O)NC(=O)Nc2nc(OC)cc(OC)n2	0	0	11.7	0.922	10.7874	0	#DIV/0!	Wetmore 2012	Wetmore 2012	0.00946159	6.58	0.0658	0.143793	6.95443
Simvastatin	79902-63-9	CC(C)(CC)C(=O)O[C@H]2C[C@@H](C)C=C3C=C[C@H](C)[C@H](CC[C@@H]1C[C@@H](O)CC(=O)O1)[C@@H]23	24.3	9.81818	232	0.069	16.008	0.61333	1.63044	Wetmore 2015	Wetmore 2015	0.00398	2.84	0.0284	0.140141	7.13568
Naphthalene	91-20-3	c1cccc2ccccc12	10.394	4.1996	260	0.416	108.16	0.0388276	25.7549	Wetmore 2015	Wetmore 2015	0.015598	11.77	0.1177	0.132523	7.54584
Iodosulfuron-methyl-sodium	144550-36-7	Cc2nc(NC(=O)NS(=O)(=O)c1cc(I)ccc1C(=O)OC)nc(OC)n2	5.69094	2.29937	11.7	0.926	10.8342	0.212232	4.71181	Wetmore 2012	Wetmore 2012	0.00668074	5.16	0.0516	0.129472	7.7237
Vernolate	1929-77-7	O=C(SCCC)N(CCC)CCC	25.1	10.1414	66.3	0.363	24.0669	0.421384	2.37313	Wetmore 2015	Wetmore 2015	0.01906	14.79	0.1479	0.128871	7.75971
Acenaphthylene	208-96-8	c1cc2cccc3C=Cc(c1)c23	12.384	5.00364	732	0.34	248.88	0.0201046	49.7398	Wetmore 2015	Wetmore 2015	0.011157	9.99	0.0999	0.111682	8.95402
Thidiazuron	51707-55-2	O=C(Nc1ccccc1)Nc2cnns2	4.9203	1.988	56.7	0.864	48.9888	0.0405807	24.6422	Wetmore 2012	Wetmore 2012	0.0283748	25.91	0.2591	0.109513	9.13135
Cetirizine	83881-51-0	O=C(O)COCCN1CCN(CC1)C(c2ccc(Cl)cc2)c3ccccc3	3.60481e-07	1.45649e-07	20.4	0.88	17.952	8.11323e-09	1.23255e+08	NA	Paixao 2012	0.01	9.18	0.0918	0.108932	9.18
Fenoxycarb	72490-01-8	O=C(OCC)NCCOc1ccc(cc1)Oc2ccccc2	23.0974	9.33229	62.7	0.434	27.2118	0.34295	2.91588	Wetmore 2012	Wetmore 2012	0.00326996	3.15	0.0315	0.103808	9.63313
Zamifenacin	127308-82-1	c1cc(cc2OCOc12)CCN5CCC[C@@H](OC(c3ccccc3)c4ccccc4)C5	17.108	6.91232	1120	0.04	44.8	0.154293	6.48118	Wetmore 2015	Wetmore 2015	0.002114	2.12	0.0212	0.099717	10.0284
Trifloxysulfuron-sodium	199119-58-9	O=S(=O)(NC(=O)Nc1nc(OC)cc(OC)n1)c2ncccc2OCC(F)(F)F	0	0	8.37	0.924	7.73388	0	#DIV/0!	Wetmore 2012	Wetmore 2012	0.00375977	3.91	0.0391	0.0961577	10.3996
Troglitazone	97322-87-7	Cc1c(O)c(C)c(C)c2OC(C)(CCc12)COc4ccc(CC3SC(=O)NC3=O)cc4	21.8547	8.8302	75.1	0.127	9.5377	0.92582	1.08012	NA	Naritomi 2003	0.000941	1.06	0.0106	0.0887736	11.2646
Fludioxonil	131341-86-1	N#Cc3cncc3c1cccc2OC(F)(F)Oc12	37.0472	14.9686	22.1	0.617	13.6357	1.09775	0.910957	Wetmore 2012	Wetmore 2012	0.00358288	4.32	0.0432	0.0829371	12.0573
Potassium perfluorohexanesulfonate	3871-99-6	FC(F)(C(F)(F)S(=O)(=O)O)C(F)(F)C(F)(F)C(F)(F)C(F)(F)F	0	0	0.194	0.861	0.167034	0	#DIV/0!	Wetmore 2015	Wetmore 2015	0.001342	1.74	0.0174	0.0771264	12.9657
Perfluoroheptanoic acid	375-85-9	FC(F)(C(F)(F)C(=O)O)C(F)(F)C(F)(F)C(F)(F)C(F)(F)F	0	0	1.54	0.745	1.1473	0	#DIV/0!	Wetmore 2015	Wetmore 2015	0.00164	2.39	0.0239	0.0686192	14.5732
Tridemorph	24602-86-6	CC1CN(CCCCCCCCCCCCC)CC(C)O1	12.912	5.21697	523	0.011	5.753	0.906826	1.10275	Wetmore 2015	Wetmore 2015	0.002679	3.93	0.0393	0.0681679	14.6697
Safrole	94-59-7	C=CCc1ccc2OCOc2c1	14.124	5.70667	29.2	0.674	19.6808	0.289961	3.44874	Wetmore 2015	Wetmore 2015	0.017891	29.62	0.2962	0.0604018	16.5558
Propetamphos	31218-83-4	COP(=S)(NCC)OC(\C)=C\C(=O)OC(C)C	16.2447	6.56352	4.05	0.555	2.24775	2.92004	0.342461	Wetmore 2012	Wetmore 2012	0.00978698	16.96	0.1696	0.0577062	17.3291
3-buten-2-one, 3-methyl-4-(2,6,6-trimethyl-2-cyclohexen-1-yl)-	127-51-5	CC1(C)CCC=C(C)C1\C=C(/C)C(C)=O	10.8	4.36364	60	0.227	13.62	0.320384	3.12125	Wetmore 2015	Wetmore 2015	0.006334	11.08	0.1108	0.0571661	17.4929
Diphenylamine	122-39-4	c1ccccc1Nc2ccccc2	64.5742	26.0906	971	0.389	377.719	0.069074	14.4772	Wetmore 2012	Wetmore 2012	0.00387504	6.81	0.0681	0.0569022	17.574
Oryzalin	19044-88-3	O=S(N)(=O)c1cc(c(c(c1)[N+]([O-])=O)N(CCC)CCC)[N+]([O-])=O	20.2033	8.16294	25.5	0.658	16.779	0.486497	2.05551	Wetmore 2012	Wetmore 2012	0.00480232	10.01	0.1001	0.0479752	20.8441
Pyriproxyfen	95737-68-1	CC(COc2ccc(Oc1ccccc1)cc2)Oc3ccccn3	16.8634	6.81351	1020	0.129	131.58	0.0517822	19.3116	Wetmore 2012	Wetmore 2012	0.000906998	2.25	0.0225	0.040311	24.8071
Tenidap	120210-48-2	O=C(c1c(O)n(C(N)=O)c2ccc(Cl)cc12)c3cccs3	NA	#VALUE!	29.5	0.445	13.1275	#VALUE!	#VALUE!	NA	NA	0.0007	1.83	0.0183	0.0382514	26.1429
Cyprodinil	121552-61-2	Cc2cc(nc(Nc1ccccc1)n2)C3CC3	37.7738	15.2622	271	0.422	114.362	0.133455	7.49317	Wetmore 2012	Wetmore 2012	0.00214094	5.83	0.0583	0.0367228	27.2311
Spiroxamine	118134-30-8	CC(C)(C)C1CCC2(CC1)OCC(CN(CC)CCC)O2	3.35269	1.35462	4.26	0.407	1.73382	0.781294	1.27993	Wetmore 2012	Wetmore 2012	0.00544645	15.64	0.1564	0.0348238	28.716
4,4'-methylenebis(n,n-dimethylaniline)	101-61-1	CN(C)c2ccc(Cc1ccc(cc1)N(C)C)cc2	18.846	7.61455	902	0.091	82.082	0.0927675	10.7796	Wetmore 2015	Wetmore 2015	0.001109	3.37	0.0337	0.032908	30.3877
Ametryn	834-12-8	CSc1nc(NCC)nc(NC(C)C)n1	31.5146	12.7332	42	0.524	22.008	0.578569	1.7284	Wetmore 2012	Wetmore 2012	0.0039517	12.43	0.1243	0.0317917	31.4548
Hexamethyl-p-rosaniline chloride	548-62-9	C/[N+](C)=C1\C=C\C(C=C1)=C(/c2ccc(cc2)N(C)C)c3ccc(cc3)N(C)C	8.322	3.36242	293	0.839	245.827	0.013678	73.11	Wetmore 2015	Wetmore 2015	0.013843	52.75	0.5275	0.0262427	38.1059
1,2,4,5-tetrachlorobenzene	95-94-3	Clc1cc(Cl)c(Cl)cc1Cl	8.842	3.57253	699	0.099	69.201	0.0516253	19.3703	Wetmore 2015	Wetmore 2015	0.000993	4.51	0.0451	0.0220177	45.4179
2-methyl-4,6-dinitrophenol	534-52-1	O=[N+]([O-])c1cc(cc(C)c1O)[N+]([O-])=O	0	0	3.22	0.945	3.0429	0	#DIV/0!	Wetmore 2015	Wetmore 2015	0.002637	12.34	0.1234	0.0213695	46.7956
Dinoseb	88-85-7	O=[N+]([O-])c1cc(cc(C(C)CC)c1O)[N+]([O-])=O	0	0	4.71	0.822	3.87162	0	#DIV/0!	Wetmore 2015	Wetmore 2015	0.00043	3.81	0.0381	0.0112861	88.6047
Emamectin benzoate	155569-91-8	CO[C@H]1C[C@@H](O[C@@H](C)[C@@H]1NC)O[C@@H]2[C@@H](OC)C[C@@H](O[C@H]2C)O[C@@H]3C(C)=CC[C@@H]6C[C@H](OC(=O)[C@@H]4C=C(C)[C@@H](O)[C@H]5OCC(=CC=C[C@@H]3C)[C@@]45O)C[C@@]7(O6)C=C[C@H](C)[C@H](O7)[C@@H](C)CC	0	0	254	0.128	32.512	0	#DIV/0!	Wetmore 2012	Wetmore 2012	0.00137861	14.64	0.1464	0.00941674	106.194
Buprofezin	69327-76-0	CC(C)(C)/N=C2\SCN(c1ccccc1)C(=O)N2C(C)C	18.4699	7.46258	12.1	0.384	4.6464	1.6061	0.622626	Wetmore 2012	Wetmore 2012	0.000360481	13.61	0.1361	0.00264865	377.551
5-heptyldihydro-2(3h)-furanone	104-67-6	O=C1CCC(CCCCCCC)O1	296	119.596	12.1	0.214	2.5894	46.1867	0.0216512	Wetmore 2015	Wetmore 2015	0	11.75	0.1175	0	#DIV/0!
Methoxychlor	72-43-5	COc1ccc(cc1)C(c2ccc(OC)cc2)C(Cl)(Cl)Cl	170.396	68.847	246	0.013	3.198	21.5281	0.0464509	Wetmore 2012	Wetmore 2012	0	1.33	0.0133	0	#DIV/0!
2,2-bis(4-hydroxyphenyl)-1,1,1-trichloroethane (hpte)	2971-36-0	Oc1ccc(cc1)C(c2ccc(O)cc2)C(Cl)(Cl)Cl	136.501	55.1519	18.6	0.159	2.9574	18.6488	0.0536228	Wetmore 2012	Wetmore 2012	0	1.75	0.0175	0	#DIV/0!
Triclosan	3380-34-5	Clc2cc(Cl)ccc2Oc1ccc(Cl)cc1O	118.832	48.0128	162	0.023	3.726	12.8859	0.0776043	Wetmore 2012	Wetmore 2012	0	0.89	0.0089	0	#DIV/0!
Methyl octanoate	111-11-5	O=C(CCCCCCC)OC	54.14	21.8747	3.95	0.432	1.7064	12.8192	0.0780078	Wetmore 2015	Wetmore 2015	NA	23.7	0.237	#VALUE!	#VALUE!
Malathion	121-75-5	CCOC(=O)CC(SP(=S)(OC)OC)C(=O)OCC	87.4804	35.3456	5.35	0.537	2.87295	12.3029	0.0812816	Wetmore 2012	Wetmore 2012	0	9.98	0.0998	0	#DIV/0!
Resmethrin	10453-86-8	O=C(OCc2cc(Cc1ccccc1)oc2)C3C(/C=C(\C)C)C3(C)C	98.9562	39.9823	321	0.011	3.531	11.3232	0.088314	Wetmore 2012	Wetmore 2012	0	0.98	0.0098	0	#DIV/0!
Etridiazole	2593-15-9	ClC(Cl)(Cl)c1nc(OCC)sn1	126.994	51.3109	10.6	0.483	5.1198	10.0221	0.09978	Wetmore 2012	Wetmore 2012	0	6.45	0.0645	0	#DIV/0!
Tebupirimfos	96182-53-5	CC(C)(C)c1ncc(OP(=S)(OCC)OC(C)C)cn1	22.6415	9.14807	5.87	0.161	0.94507	9.67978	0.103308	Wetmore 2012	Wetmore 2012	0	1.78	0.0178	0	#DIV/0!
Diethylstilbestrol (des)	56-53-1	Oc1ccc(cc1)C(\CC)=C(/CC)c2ccc(O)cc2	41.28	16.6788	20.8	0.091	1.8928	8.8117	0.113485	Wetmore 2015	Wetmore 2015	0	1.93	0.0193	0	#DIV/0!
Etoxazole	153233-91-1	CC(C)(C)c1cc(OCC)c(cc1)C2N=C(OC2)c3c(F)cccc3F	18.483	7.46788	35.6	0.025	0.89	8.39087	0.119177	Wetmore 2012	Wetmore 2012	0	1.95	0.0195	0	#DIV/0!
Endosulfan	115-29-7	ClC2=C(Cl)C3(Cl)C1COS(=O)OCC1C2(Cl)C3(Cl)Cl	4.98386	2.01368	1.03	0.234	0.24102	8.35483	0.119691	Wetmore 2012	Wetmore 2012	0	2.2	0.022	0	#DIV/0!
Pyridaben	96489-71-3	CC(C)(C)N2N=CC(SCc1ccc(cc1)C(C)(C)C)=C(Cl)C2=O	63.9322	25.8312	295	0.011	3.245	7.9603	0.125623	Wetmore 2012	Wetmore 2012	0	1.3	0.013	0	#DIV/0!
Fenthion	55-38-9	Cc1cc(ccc1SC)OP(=S)(OC)OC	87.1994	35.2321	23.6	0.218	5.1448	6.8481	0.146026	Wetmore 2012	Wetmore 2012	0	2.44	0.0244	0	#DIV/0!
Diazinon	333-41-5	Cc1cc(OP(=S)(OCC)OCC)nc(n1)C(C)C	52.3059	21.1337	13.6	0.253	3.4408	6.14209	0.162811	Wetmore 2012	Wetmore 2012	0	2.46	0.0246	0	#DIV/0!
Benfluralin	1861-40-1	[O-][N+](=O)c1cc(cc([N+]([O-])=O)c1N(CCCC)CC)C(F)(F)F	17.3369	7.00482	14.3	0.087	1.2441	5.63044	0.177606	Wetmore 2012	Wetmore 2012	0	1.84	0.0184	0	#DIV/0!
Tetramethrin	7696-12-0	C\C(C)=C/C3C(C(=O)OCN2C(=O)C=1CCCCC=1C2=O)C3(C)C	37.6039	15.1935	15.1	0.188	2.8388	5.35208	0.186843	Wetmore 2012	Wetmore 2012	0	5.7	0.057	0	#DIV/0!
Pirimiphos-methyl	29232-93-7	CCN(CC)c1nc(C)cc(OP(=S)(OC)OC)n1	29.7835	12.0337	7.99	0.354	2.82846	4.25452	0.235044	Wetmore 2012	Wetmore 2012	0	3.33	0.0333	0	#DIV/0!
Chlorpyrifos-methyl	5598-13-0	Clc1cc(Cl)c(Cl)nc1OP(=S)(OC)OC	12.8198	5.17972	5.74	0.214	1.22836	4.21678	0.237148	Wetmore 2012	Wetmore 2012	0	1.73	0.0173	0	#DIV/0!
Fluazifop-p-butyl	79241-46-6	O=C(OCCCC)[C@@H](C)Oc1ccc(cc1)Oc2ccc(cn2)C(F)(F)F	234.421	94.7156	372	0.068	25.296	3.74429	0.267073	Wetmore 2012	Wetmore 2012	0	0.98	0.0098	0	#DIV/0!
Quintozene	82-68-8	Clc1c(c(Cl)c(Cl)c(Cl)c1Cl)[N+]([O-])=O	21.8199	8.81611	19.2	0.152	2.9184	3.02087	0.33103	Wetmore 2012	Wetmore 2012	0	2.72	0.0272	0	#DIV/0!
Mevinphos	7786-34-7	O=P(OC)(OC)OC(/C)=C/C(=O)OC	15.6224	6.31209	2.28	0.917	2.09076	3.01904	0.331231	Wetmore 2012	Wetmore 2012	NA	66.48	0.6648	#VALUE!	#VALUE!
Butralin	33629-47-9	[O-][N+](=O)c1cc(cc([N+]([O-])=O)c1NC(C)CC)C(C)(C)C	31.3547	12.6686	62.6	0.078	4.8828	2.59453	0.385427	Wetmore 2012	Wetmore 2012	0	3.27	0.0327	0	#DIV/0!
Tri(ethylene glycol) bis(2-ethylhexanoate)	94-28-0	O=C(OCCOCCOCCOC(=O)C(CC)CCCC)C(CC)CCCC	22.62	9.13939	304	0.012	3.648	2.50532	0.399151	Wetmore 2015	Wetmore 2015	0	1.94	0.0194	0	#DIV/0!
Trifluralin	1582-09-8	[O-][N+](=O)c1cc(cc([N+]([O-])=O)c1N(CCC)CCC)C(F)(F)F	8.98446	3.63009	13.2	0.114	1.5048	2.41234	0.414536	Wetmore 2012	Wetmore 2012	0	2	0.02	0	#DIV/0!
Coumaphos	56-72-4	CCOP(=S)(OCC)Oc1ccc2c(c1)OC(=O)C(Cl)=C2C	27.8837	11.2661	36.1	0.146	5.2706	2.13754	0.467827	Wetmore 2012	Wetmore 2012	0	1.12	0.0112	0	#DIV/0!
Phosalone	2310-17-0	CCOP(=S)(OCC)SCN1c2ccc(Cl)cc2OC1=O	56.0216	22.635	69.3	0.158	10.9494	2.06724	0.483737	Wetmore 2012	Wetmore 2012	0	0.89	0.0089	0	#DIV/0!
Indoxacarb	173584-44-6	FC(F)(F)Oc1ccc(cc1)N(C(=O)OC)C(=O)N2N=C3c4ccc(Cl)cc4C[C@@]3(OC2)C(=O)OC	31.361	12.6711	28.4	0.222	6.3048	2.00976	0.497572	Wetmore 2012	Wetmore 2012	0	1.07	0.0107	0	#DIV/0!
Ethion	563-12-2	S=P(SCSP(=S)(OCC)OCC)(OCC)OCC	10.414	4.20768	26	0.085	2.21	1.90393	0.52523	Wetmore 2015	Wetmore 2015	0	1.98	0.0198	0	#DIV/0!
Hexythiazox	78587-05-0	Clc1ccc(cc1)[C@@H]2SC(=O)N([C@H]2C)C(=O)NC3CCCCC3	110.44	44.6223	116	0.214	24.824	1.79755	0.556313	Wetmore 2012	Wetmore 2012	0	3.08	0.0308	0	#DIV/0!
Chlorpropham	101-21-3	Clc1cc(NC(=O)OC(C)C)ccc1	43.8264	17.7076	21.8	0.483	10.5294	1.68173	0.594625	Wetmore 2012	Wetmore 2012	0	6.73	0.0673	0	#DIV/0!
Butylate	2008-41-5	CC(C)CN(CC(C)C)C(=O)SCC	52.5097	21.216	49.1	0.288	14.1408	1.50034	0.666515	Wetmore 2012	Wetmore 2012	0	11.08	0.1108	0	#DIV/0!
Tamoxifen	10540-29-1	CN(C)CCOc1ccc(cc1)/C(c2ccccc2)=C(/CC)c3ccccc3	8.52	3.44242	212	0.011	2.332	1.47617	0.67743	Wetmore 2015	Wetmore 2015	0	1.57	0.0157	0	#DIV/0!
Fenitrothion	122-14-5	S=P(Oc1cc(C)c(cc1)[N+]([O-])=O)(OC)OC	10.0225	4.04949	6.45	0.427	2.75415	1.47032	0.680123	Wetmore 2012	Wetmore 2012	0	4.59	0.0459	0	#DIV/0!
Eptc	759-94-4	CCCN(CCC)C(=O)SCC	80.3595	32.4685	44.1	0.522	23.0202	1.41043	0.709002	Wetmore 2012	Wetmore 2012	0	23.67	0.2367	0	#DIV/0!
Disulfoton	298-04-4	CCSCCSP(=S)(OCC)OCC	58.0163	23.4409	78.7	0.229	18.0223	1.30066	0.768839	Wetmore 2012	Wetmore 2012	0	5.73	0.0573	0	#DIV/0!
Fenoxaprop-ethyl	66441-23-4	O=C(OCC)C(C)Oc1ccc(cc1)Oc2nc3ccc(Cl)cc3o2	54.9285	22.1933	96.1	0.181	17.3941	1.27591	0.783753	Wetmore 2012	Wetmore 2012	0	1.54	0.0154	0	#DIV/0!
Amitraz	33089-61-1	Cc2ccc(/N=C/N(C)/C=N/c1ccc(C)cc1C)c(C)c2	19.3018	7.79872	38	0.165	6.27	1.24382	0.803978	Wetmore 2012	Wetmore 2012	0	3.42	0.0342	0	#DIV/0!
Parathion	56-38-2	S=P(Oc1ccc(cc1)[N+]([O-])=O)(OCC)OCC	6.65048	2.68706	7.57	0.299	2.26343	1.18716	0.842344	Wetmore 2012	Wetmore 2012	0	3.49	0.0349	0	#DIV/0!
Nitrapyrin	1929-82-4	ClC(Cl)(Cl)c1cccc(Cl)n1	36.8352	14.8829	31.4	0.406	12.7484	1.16743	0.856579	Wetmore 2012	Wetmore 2012	0	4.53	0.0453	0	#DIV/0!
Oxadiazon	19666-30-9	O=C2OC(=NN2c1cc(OC(C)C)c(Cl)cc1Cl)C(C)(C)C	14.0214	5.66523	30.3	0.161	4.8783	1.16131	0.861095	Wetmore 2012	Wetmore 2012	0	1.16	0.0116	0	#DIV/0!
Cinmethylin	87818-31-3	C[C@]32CC[C@@](C[C@@H]2OCc1ccccc1C)(O3)C(C)C	28.1699	11.3818	156	0.068	10.608	1.07294	0.932017	Wetmore 2012	Wetmore 2012	0	3.28	0.0328	0	#DIV/0!
Mgk	113-48-4	CCC(CCCC)CN3C(=O)C2C1CC(C=C1)C2C3=O	134.327	54.2735	229	0.224	51.296	1.05805	0.945139	Wetmore 2012	Wetmore 2012	0	7.77	0.0777	0	#DIV/0!
Prometon	1610-18-0	COc1nc(NC(C)C)nc(NC(C)C)n1	14.1064	5.69956	10.1	0.564	5.6964	1.00055	0.999446	Wetmore 2012	Wetmore 2012	0	11.93	0.1193	0	#DIV/0!
4-octylphenol	1806-26-4	Oc1ccc(CCCCCCCC)cc1	15.654	6.32485	578	0.011	6.358	0.994786	1.00524	Wetmore 2015	Wetmore 2015	0	2.24	0.0224	0	#DIV/0!
Prodiamine	29091-21-2	[O-][N+](=O)c1cc(c(N)c([N+]([O-])=O)c1N(CCC)CCC)C(F)(F)F	7.21555	2.91537	16.4	0.192	3.1488	0.925868	1.08007	Wetmore 2012	Wetmore 2012	0	2.48	0.0248	0	#DIV/0!
Permethrin	52645-53-1	Cl/C(Cl)=C/C3C(C(=O)OCc2cccc(Oc1ccccc1)c2)C3(C)C	46.2098	18.6706	1920	0.011	21.12	0.884026	1.13119	Wetmore 2012	Wetmore 2012	0	0.84	0.0084	0	#DIV/0!
Prometryn	7287-19-6	CSc1nc(NC(C)C)nc(NC(C)C)n1	35.7812	14.457	45	0.416	18.72	0.772278	1.29487	Wetmore 2012	Wetmore 2012	0	8.88	0.0888	0	#DIV/0!
2-hydroxy-4-(octyloxy)benzophenone	1843-05-6	O=C(c1ccc(cc1O)OCCCCCCCC)c2ccccc2	51.14	20.6626	2480	0.011	27.28	0.757428	1.32026	Wetmore 2015	Wetmore 2015	0	1.2	0.012	0	#DIV/0!
Octrizole	3147-75-9	CC(C)(C)CC(C)(C)c1cc(c(O)cc1)n2nc3ccccc3n2	9.802	3.9604	537	0.011	5.907	0.670459	1.49151	Wetmore 2015	Wetmore 2015	0	1.14	0.0114	0	#DIV/0!
Ethalfluralin	55283-68-6	[O-][N+](=O)c1cc(cc([N+]([O-])=O)c1N(CC(=C)C)CC)C(F)(F)F	3.02577	1.22253	9.3	0.197	1.8321	0.667285	1.49861	Wetmore 2012	Wetmore 2012	0	2.65	0.0265	0	#DIV/0!
Isoeugenol	97-54-1	Oc1ccc(cc1OC)C=CC	71.78	29.002	68.6	0.645	44.247	0.655457	1.52565	Wetmore 2015	Wetmore 2015	0	19.47	0.1947	0	#DIV/0!
Niclosamide	50-65-7	Clc2cc(ccc2NC(=O)c1cc(Cl)ccc1O)[N+]([O-])=O	12	4.84848	29.6	0.252	7.4592	0.650001	1.53846	Wetmore 2012	Wetmore 2012	0	2.17	0.0217	0	#DIV/0!
O,p'-ddt	789-02-6	Clc2ccccc2C(c1ccc(Cl)cc1)C(Cl)(Cl)Cl	15.09	6.09697	1000	0.011	11	0.55427	1.80417	Wetmore 2015	Wetmore 2015	0	1.2	0.012	0	#DIV/0!
Tri-allate	2303-17-5	Cl/C(Cl)=C(\Cl)CSC(=O)N(C(C)C)C(C)C	2.89083	1.16801	18.1	0.121	2.1901	0.533315	1.87506	Wetmore 2012	Wetmore 2012	0	4.68	0.0468	0	#DIV/0!
4-(2-methylbutan-2-yl)phenol	80-46-6	Oc1ccc(cc1)C(C)(C)CC	20.9556	8.4669	49.3	0.353	17.4029	0.486522	2.0554	Wetmore 2015	Wetmore 2015	0	8.57	0.0857	0	#DIV/0!
Dicofol	115-32-2	OC(c1ccc(Cl)cc1)(c2ccc(Cl)cc2)C(Cl)(Cl)Cl	4.92063	1.98813	100	0.042	4.2	0.473365	2.11253	Wetmore 2012	Wetmore 2012	0	1.26	0.0126	0	#DIV/0!
Benomyl	17804-35-2	O=C(OC)Nc2nc1ccccc1n2C(=O)NCCCC	56.6859	22.9034	63.2	0.778	49.1696	0.465804	2.14683	Wetmore 2012	Wetmore 2012	0	8.34	0.0834	0	#DIV/0!
Propanil	709-98-8	Clc1ccc(NC(=O)CC)cc1Cl	38.8981	15.7164	74.3	0.511	37.9673	0.413945	2.41578	Wetmore 2012	Wetmore 2012	0	9.25	0.0925	0	#DIV/0!
Iprodione	36734-19-7	O=C2CN(C(=O)NC(C)C)C(=O)N2c1cc(Cl)cc(Cl)c1	11.7045	4.72908	18.8	0.633	11.9004	0.397388	2.51643	Wetmore 2012	Wetmore 2012	0	7.16	0.0716	0	#DIV/0!
Fipronil	120068-37-3	FC(F)(F)S(=O)c1c(N)n(nc1C#N)c2c(Cl)cc(cc2Cl)C(F)(F)F	1.36739	0.55248	4.42	0.315	1.3923	0.396811	2.52009	Wetmore 2012	Wetmore 2012	0	0.88	0.0088	0	#DIV/0!
Fluroxypyr-meptyl	81406-37-3	CC(CCCCCC)OC(=O)COc1nc(F)c(Cl)c(N)c1Cl	9.91533	4.0062	281	0.036	10.116	0.396026	2.52509	Wetmore 2012	Wetmore 2012	0	2.5	0.025	0	#DIV/0!
Bensulfuron-methyl	83055-99-6	O=C(Nc1nc(cc(OC)n1)OC)NS(=O)(=O)Cc2ccccc2C(=O)OC	10.2552	4.14351	11.6	0.911	10.5676	0.392095	2.5504	Wetmore 2012	Wetmore 2012	0	6.03	0.0603	0	#DIV/0!
Butachlor	23184-66-9	ClCC(=O)N(COCCCC)c1c(cccc1CC)CC	100.804	40.7289	664	0.157	104.248	0.390692	2.55956	Wetmore 2012	Wetmore 2012	0	2.64	0.0264	0	#DIV/0!
P,p'-ddt	50-29-3	Clc1ccc(cc1)C(c2ccc(Cl)cc2)C(Cl)(Cl)Cl	7.35	2.9697	734	0.011	8.074	0.36781	2.7188	Wetmore 2015	Wetmore 2015	0	1.19	0.0119	0	#DIV/0!
Prosulfuron	94125-34-5	Cc2nc(NC(=O)NS(=O)(=O)c1ccccc1CCC(F)(F)F)nc(OC)n2	10.3694	4.18965	12.5	0.921	11.5125	0.363922	2.74784	Wetmore 2012	Wetmore 2012	0	3.59	0.0359	0	#DIV/0!
Temazepam	846-50-4	Clc1ccc2c(c1)C(=NC(O)C(=O)N2C)c3ccccc3	2	0.808081	3.19	0.814	2.59666	0.3112	3.21337	NA	McGinnity 2004	NA	8.91	0.0891	#VALUE!	#VALUE!
Pendimethalin	40487-42-1	[O-][N+](=O)c1c(C)c(C)cc([N+]([O-])=O)c1NC(CC)CC	7.21432	2.91488	56.4	0.182	10.2648	0.283968	3.52152	Wetmore 2012	Wetmore 2012	0	5.04	0.0504	0	#DIV/0!
Picloram	1918-02-01	Nc1c(Cl)c(nc(Cl)c1Cl)C(=O)O	3.10872	1.25605	5	0.935	4.675	0.268673	3.72199	Wetmore 2012	Wetmore 2012	0	4.56	0.0456	0	#DIV/0!
Novaluron	116714-46-6	Clc1cc(ccc1OC(F)(F)C(F)OC(F)(F)F)NC(=O)NC(=O)c2c(F)cccc2F	2.87291	1.16077	77.3	0.056	4.3288	0.26815	3.72925	Wetmore 2012	Wetmore 2012	0	0.56	0.0056	0	#DIV/0!
Lindane	58-89-9	Cl[C@H]1[C@H](Cl)[C@H](Cl)[C@@H](Cl)[C@H](Cl)[C@@H]1Cl	13.2397	5.34937	67.1	0.298	19.9958	0.267525	3.73797	Wetmore 2012	Wetmore 2012	0	5.66	0.0566	0	#DIV/0!
Diclofop-methyl	51338-27-3	Clc2cc(Cl)ccc2Oc1ccc(OC(C)C(=O)OC)cc1	6.44855	2.60547	123	0.08	9.84	0.264784	3.77666	Wetmore 2012	Wetmore 2012	0	1.42	0.0142	0	#DIV/0!
Cycloate	1134-23-2	CCN(C(=O)SCC)C1CCCCC1	34.4821	13.9321	136	0.398	54.128	0.257393	3.88512	Wetmore 2012	Wetmore 2012	0	14.93	0.1493	0	#DIV/0!
Acifluorfen	50594-66-6	Clc2cc(ccc2Oc1cc(C(=O)O)c(cc1)[N+]([O-])=O)C(F)(F)F	1.76786	0.714286	3.98	0.714	2.84172	0.251357	3.97841	Wetmore 2012	Wetmore 2012	0	0.48	0.0048	0	#DIV/0!
Dithiopyr	97886-45-8	FC(F)(F)c1nc(c(c(CC(C)C)c1C(=O)SC)C(=O)SC)C(F)F	13.2489	5.35311	155	0.138	21.39	0.250262	3.99581	Wetmore 2012	Wetmore 2012	0	1.36	0.0136	0	#DIV/0!
Anilazine	101-05-3	Clc2nc(Nc1ccccc1Cl)nc(Cl)n2	22.4971	9.08973	119	0.331	39.389	0.230768	4.33335	Wetmore 2012	Wetmore 2012	0	4.03	0.0403	0	#DIV/0!
Piperonyl butoxide	51-03-6	CCCc1cc2OCOc2cc1COCCOCCOCCCC	76.0054	30.7093	485	0.278	134.83	0.227763	4.39053	Wetmore 2012	Wetmore 2012	0	4.08	0.0408	0	#DIV/0!
Mesosulfuron-methyl	208465-21-8	O=C(Nc1nc(cc(OC)n1)OC)NS(=O)(=O)c2cc(CNS(C)(=O)=O)ccc2C(=O)OC	5.45214	2.20288	10.9	0.938	10.2242	0.215458	4.64128	Wetmore 2012	Wetmore 2012	0	5.49	0.0549	0	#DIV/0!
Sulfasalazine	599-79-1	O=S(=O)(Nc1ccccn1)c3ccc(/N=N/c2cc(C(=O)O)c(O)cc2)cc3	5.16	2.08485	11.4	0.925	10.545	0.19771	5.05792	Wetmore 2015	Wetmore 2015	0	1.03	0.0103	0	#DIV/0!
Lactofen	77501-63-4	Clc2cc(ccc2Oc1cc(C(=O)OC(C)C(=O)OCC)c(cc1)[N+]([O-])=O)C(F)(F)F	1.28031	0.517296	30.6	0.088	2.6928	0.192103	5.20553	Wetmore 2012	Wetmore 2012	0	0.86	0.0086	0	#DIV/0!
Tefluthrin	79538-32-2	Cl\C(=C/C2C(C(=O)OCc1c(F)c(F)c(C)c(F)c1F)C2(C)C)C(F)(F)F	24.8124	10.0252	5040	0.011	55.44	0.18083	5.53006	Wetmore 2012	Wetmore 2012	0	0.6	0.006	0	#DIV/0!
Tebufenpyrad	119168-77-3	Clc2c(C(=O)NCc1ccc(cc1)C(C)(C)C)n(C)nc2CC	15.9356	6.43863	91.3	0.449	40.9937	0.157064	6.36684	Wetmore 2012	Wetmore 2012	0	2.86	0.0286	0	#DIV/0!
Fentin	76-87-9	O[Sn](c1ccccc1)(c2ccccc2)c3ccccc3	7.74861	3.13075	392	0.051	19.992	0.1566	6.38568	Wetmore 2012	Wetmore 2012	0	0.95	0.0095	0	#DIV/0!
1,2-benzisothiazolin-3-one	2634-33-5	O=C2NSc1ccccc12	34.74	14.0364	118	0.844	99.592	0.140939	7.09528	Wetmore 2015	Wetmore 2015	0	33.68	0.3368	0	#DIV/0!
Triprolidine	486-12-4	Cc1ccc(cc1)C(=C\CN2CCCC2)/c3ccccn3	4.3	1.73737	33.6	0.387	13.0032	0.133611	7.4844	NA	McGinnity 2004	NA	12.82	0.1282	#VALUE!	#VALUE!
Napropamide	15299-99-7	CCN(CC)C(=O)C(C)Oc2cccc1ccccc12	15.1493	6.12094	117	0.464	54.288	0.112749	8.86923	Wetmore 2012	Wetmore 2012	0	5.29	0.0529	0	#DIV/0!
Fenbuconazole	114369-43-6	Clc3ccc(CCC(Cn1cncn1)(C#N)c2ccccc2)cc3	11.1919	4.52197	107	0.392	41.944	0.10781	9.27561	Wetmore 2012	Wetmore 2012	0	4.68	0.0468	0	#DIV/0!
Clofentezine	74115-24-5	Clc3ccccc3c1nnc(nn1)c2ccccc2Cl	5.43366	2.19542	30.1	0.71	21.371	0.102729	9.73437	Wetmore 2012	Wetmore 2012	0	4.25	0.0425	0	#DIV/0!
Dichloran	99-30-9	Clc1cc(cc(Cl)c1N)[N+]([O-])=O	4.43403	1.79153	27.3	0.66	18.018	0.0994298	10.0573	Wetmore 2012	Wetmore 2012	0	17.25	0.1725	0	#DIV/0!
Thiobencarb	28249-77-6	Clc1ccc(CSC(=O)N(CC)CC)cc1	18.2764	7.38439	223	0.381	84.963	0.086913	11.5058	Wetmore 2012	Wetmore 2012	0	5.52	0.0552	0	#DIV/0!
Bifenthrin	82657-04-3	Cl\C(=C/C3C(C(=O)OCc2cccc(c1ccccc1)c2C)C3(C)C)C(F)(F)F	6.74433	2.72498	3370	0.011	37.07	0.073509	13.6038	Wetmore 2012	Wetmore 2012	0	0.39	0.0039	0	#DIV/0!
Zileuton	111406-87-2	NC(=O)N(O)C(C)c1cc2ccccc2s1	2.1	0.848485	16.3	0.795	12.9585	0.0654771	15.2725	NA	McGinnity 2004	NA	10.93	0.1093	#VALUE!	#VALUE!
Clorophene	120-32-1	Oc2ccc(Cl)cc2Cc1ccccc1	5.00103	2.02062	160	0.218	34.88	0.0579306	17.262	Wetmore 2012	Wetmore 2012	0	3.45	0.0345	0	#DIV/0!
7,12-dimethylbenz(a)anthracene	57-97-6	Cc2c1c4ccccc4ccc1c(C)c3ccccc23	3.226	1.30343	2060	0.011	22.66	0.0575214	17.3848	Wetmore 2015	Wetmore 2015	0	2.12	0.0212	0	#DIV/0!
Dibenzofuran	132-64-9	c1cccc2oc3ccccc3c12	8.3	3.35354	303	0.252	76.356	0.0439197	22.7688	Wetmore 2015	Wetmore 2015	0	5.31	0.0531	0	#DIV/0!
Esfenvalerate	66230-04-4	Clc1ccc(cc1)[C@H](C(C)C)C(=O)O[C@H](C#N)c3cccc(Oc2ccccc2)c3	4.98391	2.0137	4680	0.011	51.48	0.0391162	25.5649	Wetmore 2012	Wetmore 2012	0	0.8	0.008	0	#DIV/0!
Fluoxetine	54910-89-3	FC(F)(F)c2ccc(OC(CCNC)c1ccccc1)cc2	1	0.40404	36.5	0.3	10.95	0.0368987	27.1013	NA	McGinnity 2004	NA	5.97	0.0597	#VALUE!	#VALUE!
Diethylhexyl phthalate (dehp)	117-81-7	CCC(CCCC)COC(=O)c1ccccc1C(=O)OCC(CC)CCCC	2.64583	1.06902	4750	0.011	52.25	0.0204598	48.8764	Wetmore 2012	Wetmore 2012	NA	0.6	0.006	#VALUE!	#VALUE!
Carbosulfan	55285-14-8	CCCCN(CCCC)SN(C)C(=O)Oc1cccc2CC(C)(C)Oc12	26.74	10.804	3220	0.214	689.08	0.0156789	63.7798	Wetmore 2015	Wetmore 2015	0	0.95	0.0095	0	#DIV/0!
Didecyl dimethyl ammonium chloride	7173-51-5	C[N+](C)(CCCCCCCCCC)CCCCCCCCCC	18.65	7.53535	1540	0.392	603.68	0.0124824	80.113	Wetmore 2015	Wetmore 2015	0	23.06	0.2306	0	#DIV/0!
Ritonavir	155213-67-5	CC(C)c4nc(CN(C)C(=O)N[C@H](C(=O)N[C@@H](Cc1ccccc1)C[C@H](O)[C@H](Cc2ccccc2)NC(=O)OCc3cncs3)C(C)C)cs4	2.1	0.848485	1730	0.482	833.86	0.00101754	982.764	NA	McGinnity 2004	NA	2.32	0.0232	#VALUE!	#VALUE!
Naproxen	22204-53-1	O=C(O)[C@@H](C)c1ccc2cc(ccc2c1)OC	1.43992e-05	5.81786e-06	9	0.877	7.893	7.37091e-07	1.35668e+06	NA	Paixao 2012	0	1.33	0.0133	0	#DIV/0!
3-phenoxybenzoic acid	3739-38-6	O=C(O)c2cc(Oc1ccccc1)ccc2	0	0	8.66	0.872	7.55152	0	#DIV/0!	Wetmore 2015	Wetmore 2015	0	0.92	0.0092	0	#DIV/0!
Perfluorodecanoic acid	335-76-2	FC(F)(C(F)(F)C(=O)O)C(F)(F)C(F)(F)C(F)(F)C(F)(F)C(F)(F)C(F)(F)C(F)(F)F	0	0	2.47	0.503	1.24241	0	#DIV/0!	Wetmore 2015	Wetmore 2015	0	0.44	0.0044	0	#DIV/0!
Perfluoroundecanoic acid	2058-94-8	FC(F)(C(F)(F)C(=O)O)C(F)(F)C(F)(F)C(F)(F)C(F)(F)C(F)(F)C(F)(F)C(F)(F)C(F)(F)F	0	0	3.1	0.433	1.3423	0	#DIV/0!	Wetmore 2015	Wetmore 2015	0	0.32	0.0032	0	#DIV/0!
Chlorethoxyfos	54593-83-8	CCOP(=S)(OCC)OC(Cl)C(Cl)(Cl)Cl	0	0	1.23	0.25	0.3075	0	#DIV/0!	Wetmore 2012	Wetmore 2012	0	2.47	0.0247	0	#DIV/0!
Isopropalin	33820-53-0	[O-][N+](=O)c1cc(cc([N+]([O-])=O)c1N(CCC)CCC)C(C)C	NA	#VALUE!	26.3	0.103	2.7089	#VALUE!	#VALUE!	Wetmore 2015	Wetmore 2015	NA	3.61	0.0361	#VALUE!	#VALUE!
Flumetralin	62924-70-3	Clc2cccc(F)c2CN(CC)c1c(cc(cc1[N+]([O-])=O)C(F)(F)F)[N+]([O-])=O	0	0	23.3	0.049	1.1417	0	#DIV/0!	Wetmore 2012	Wetmore 2012	0	0.87	0.0087	0	#DIV/0!
Quinoxyfen	124495-18-7	Fc1ccc(cc1)Oc2ccnc3cc(Cl)cc(Cl)c23	0	0	1330	0.028	37.24	0	#DIV/0!	Wetmore 2012	Wetmore 2012	0	2.65	0.0265	0	#DIV/0!
				#: human body weight = 70 kg; liver weight = 1400 grams; 99 million cells/g liver weight; 40 mg microsomal protein/g liver
